# Supplementary material for: Anionic aza 8π-electrocyclization as an unprecedented pathway versus 7-endo-dig: DFT study on the mechanism of base-catalyzed benzofuroazepine synthesis via cyclization of (2-alkynylbenzyl)oxy nitriles
Source: Royal Society of Chemistry journal article supplement (doi:10.1039/d4cp02458c), 2024-01-01
Supplement: d4cp02458c1.pdf [file d4cp02458c1.pdf]

## Supporting Information

### **Anionic Aza $8\pi$ -electrocyclization as unprecedented pathway versus 7-end dig: DFT study on the mechanism of Base-Catalyzed of Benzofuroazepine synthesis via Cyclization of (2-Alkynylbenzyl)oxy Nitriles**

Omid Amiri, Ayoob Bazgir

### **Discussion of the M06-2X/6-311+G- (d,p)-CPCM(THF)//B3LYP/6-31G(d) study 6-exo-dig pathway**

**INT\_2** by deportation from tert-butanol through **TS\_exd2** result in **INT\_exd3**. It is worth noting that **TS\_exd2** is lower in terms of energy than **TS\_end2** (figure S1), and what is more important is that this mode of action 6-exo-dig result in a 6-membered ring that is not observed by experimental, but one of derivatives only as a trace amount as reported by Zeni.<sup>1</sup>

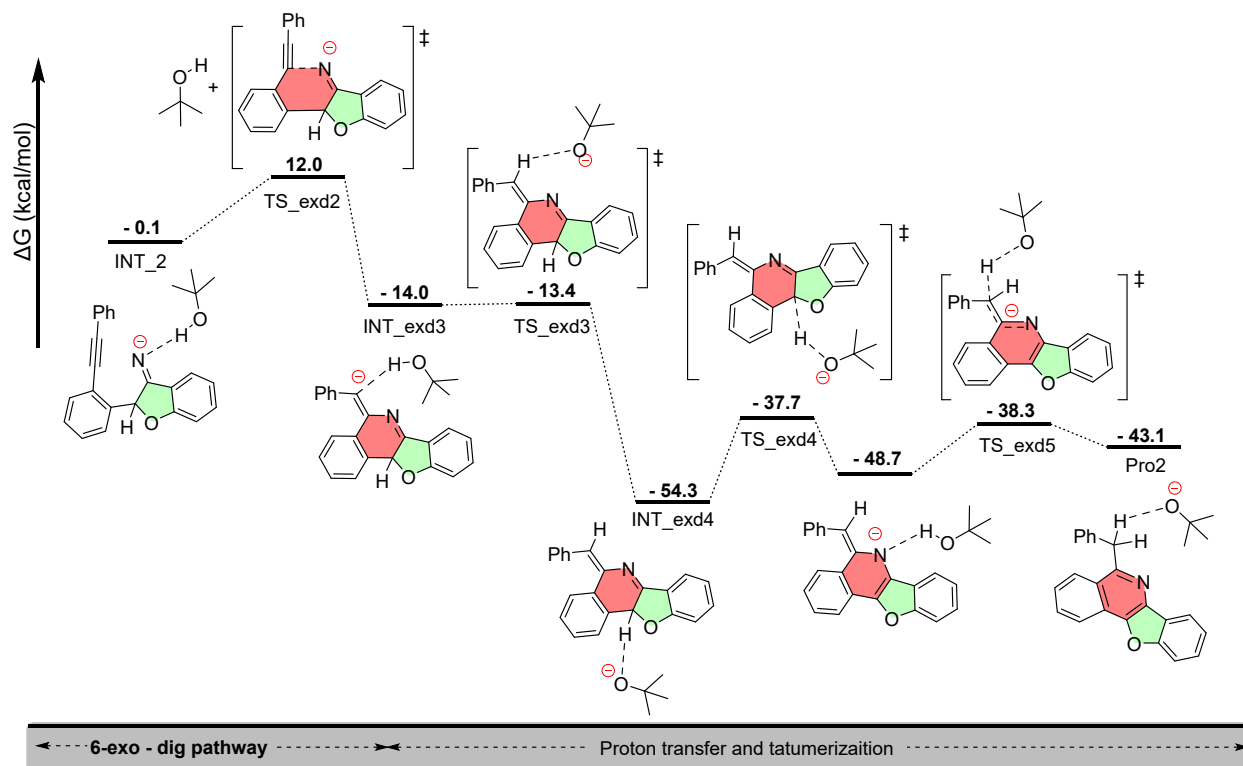

**Fig. S 1** calculated potential energy surface of the second cyclization through 6-exo-dig mode at M06-2X/6-311+G- (d,p)-CPCM(THF)//B3LYP/6-31G(d)

As it can be seen from **figure S 1**, INT\_exd4 can be easily formed through TS\_exd3. Pro\_2 can be formed from INT\_exd4 through intervention of tert-butoxide, tert-butanol (Figure S1).

## Comparison of bond length and bond order while going from Int\_4 to TS\_5 to Int\_5

As it can be seen from the tables in Fig. S2, the conjugation in forming 7-membered in TS\_5 can be deduced based on bond order and bond length in structure of TS\_5 relative to INT\_4 and INT\_5.

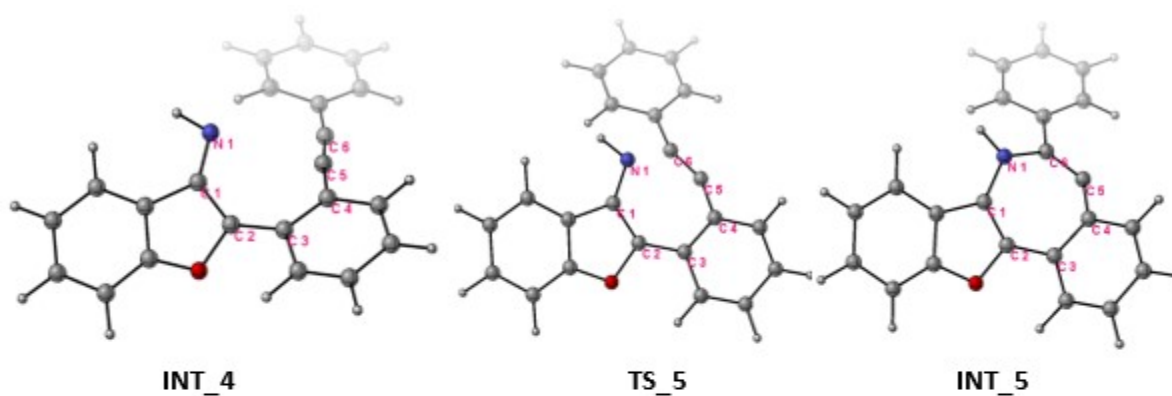

| Bond length (Å) |       |       |       |       |       |       |       |
|-----------------|-------|-------|-------|-------|-------|-------|-------|
|                 | N1-C1 | C1-C2 | C2-C3 | C3-C4 | C4-C5 | C5-C6 | N1-C6 |
| INT_4           | 1.32  | 1.44  | 1.42  | 1.45  | 1.41  | 1.22  | 3.26  |
| TS_5            | 1.35  | 1.41  | 1.43  | 1.44  | 1.42  | 1.26  | 2.07  |
| INT_5           | 1.40  | 1.38  | 1.44  | 1.44  | 1.43  | 1.34  | 1.48  |

  

| Bond order |       |       |       |       |       |       |       |
|------------|-------|-------|-------|-------|-------|-------|-------|
|            | N1-C1 | C1-C2 | C2-C3 | C3-C4 | C4-C5 | C5-C6 | N1-C6 |
| INT_4      | 1.71  | 0.74  | 1.14  | 1.35  | 1.01  | 2.37  | -     |
| TS_5       | 1.37  | 1.22  | 1.00  | 1.01  | 1.76  | 2.13  | -     |
| INT_5      | 1.08  | 1.29  | 0.85  | 1.15  | 1.34  | 2.06  | 0.76  |

**Fig. S 2** Bond length of forming 7-membered heterocycle in INT\_4, TS\_5, and INT\_5 at M06-2X/6-311+G- (d,p)-CPCM(THF)//B3LYP/6-31G(d)

**effect of functional on optimization and consequently the electronic energy calculated at M06-2X/6-311+G- (d,p)-CPCM(THF)**

As it can be seen from the Fig S3, the optimization of key transition states, namely **TS\_5** and **TS\_end2** at different functionals and subsequently calculating the electronic energy at M06-2X/6-311+G- (d,p)-CPCM(THF) level of theory has nearly no effect on the result that have been discussed in the main text with calculating at the M06-2X/6-311+G- (d,p)-CPCM(THF)//B3LYP/6-31G(d) level of theory.

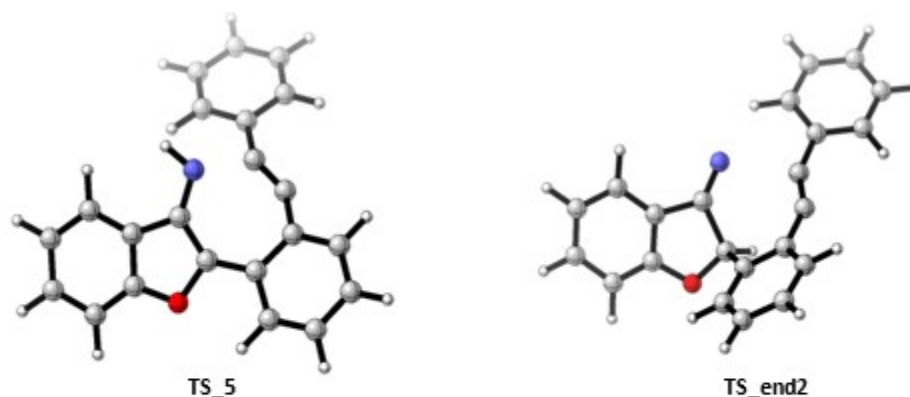

| Level of theory  | TS_5 (hartree) | TS_end2 (hartree) | $\Delta G_{TS\_end2 - TS\_5}$ (kcal/mol) |
|------------------|----------------|-------------------|------------------------------------------|
| wb97xd/6-31+g(d) | -976.3700      | -976.3447         | 15.9                                     |
| M062x/6-31+g(d)  | -976.3706      | -976.3454         | 15.8                                     |
| b3lyp/6-31g(d)   | -976.3709      | -976.3477         | 14.6                                     |

**Fig. S 3** effect of different functional and basis set at the key transition state that is aza anionic 8 pi electrocyclization and 7-end-dig cyclization step (electronic energy calculated at M06-2X/6-311+G- (d,p)-CPCM(THF) at optimized structure at related level of theory)

## Cartesian coordinates, electronic energies, and imaginary frequencies

### INT\_2

E(B3lyp/6-31g(d) = -1210.380064 Hartree

Imaginary Freq= 0

-1 1

|   |             |             |             |
|---|-------------|-------------|-------------|
| C | -4.86275400 | 1.59012900  | -1.56324700 |
| C | -4.35739400 | 0.32284800  | -1.87915300 |
| C | -3.11935500 | -0.02469500 | -1.34542600 |
| C | -2.38597100 | 0.83519800  | -0.52949900 |
| C | -2.89380100 | 2.09841100  | -0.22933400 |
| C | -4.14162100 | 2.46948000  | -0.74646700 |
| H | -5.82954300 | 1.89172400  | -1.96251800 |
| H | -4.90016500 | -0.36959800 | -2.51765400 |
| H | -2.30607400 | 2.77292500  | 0.38987000  |
| H | -4.55349700 | 3.44979300  | -0.51540400 |
| C | -1.07278200 | 0.19974900  | -0.16775200 |
| N | -0.05558700 | 0.64124800  | 0.38999000  |
| O | -2.51539600 | -1.23369700 | -1.57906100 |
| C | -1.28224400 | -1.30089300 | -0.81508400 |
| H | -0.46367900 | -1.48029900 | -1.51676400 |
| C | -1.37256400 | -2.40233000 | 0.19331900  |

|   |             |             |             |
|---|-------------|-------------|-------------|
| C | -2.61499600 | -2.83449400 | 0.68310600  |
| C | -0.20061400 | -3.02204300 | 0.71038700  |
| C | -2.71354000 | -3.83853400 | 1.64202500  |
| H | -3.51376400 | -2.37680000 | 0.28463100  |
| C | -0.31662800 | -4.04108400 | 1.67790300  |
| C | -1.55963700 | -4.44997900 | 2.14485500  |
| H | -3.69424000 | -4.14842700 | 1.99706000  |
| H | 0.59310100  | -4.50077600 | 2.05465200  |
| H | -1.63062200 | -5.23600500 | 2.89298600  |
| C | 1.09088000  | -2.62673900 | 0.26383800  |
| C | 2.19333300  | -2.29014100 | -0.12752000 |
| C | 3.36019100  | -1.57632800 | -0.52942700 |
| C | 4.59605600  | -2.20212300 | -0.77477000 |
| C | 3.25155000  | -0.17594700 | -0.67775600 |
| C | 5.70050900  | -1.44577000 | -1.16406000 |
| H | 4.67836100  | -3.27943600 | -0.65799400 |
| C | 4.36273000  | 0.56755400  | -1.06537200 |
| H | 2.28726700  | 0.28414000  | -0.46010500 |
| C | 5.58823500  | -0.06107900 | -1.31296300 |
| H | 6.65178000  | -1.93889900 | -1.35278300 |
| H | 4.27258000  | 1.64612600  | -1.17006500 |
| H | 6.45176100  | 0.52562400  | -1.61848600 |
| C | 0.89805400  | 3.88025600  | 1.14820200  |

|   |             |            |             |
|---|-------------|------------|-------------|
| C | 0.69778600  | 5.28920500 | 1.72532600  |
| H | 1.54404100  | 5.94821900 | 1.48983800  |
| H | -0.21653100 | 5.73558700 | 1.31703900  |
| H | 0.58901200  | 5.23582500 | 2.81491200  |
| C | 2.16471700  | 3.23654300 | 1.74884100  |
| H | 2.07575400  | 3.19298000 | 2.84082500  |
| H | 2.27282600  | 2.21114800 | 1.38095600  |
| H | 3.07422400  | 3.80000400 | 1.49612100  |
| C | 1.01415000  | 3.94784100 | -0.38864100 |
| H | 1.89312500  | 4.52484100 | -0.70956200 |
| H | 1.08591100  | 2.93581200 | -0.79995100 |
| H | 0.11837900  | 4.41796200 | -0.81157000 |
| O | -0.24308900 | 3.13355200 | 1.52473700  |
| H | -0.16875700 | 2.19975200 | 1.11063900  |

### INT\_1

E(B3lyp/6-31g(d) = -1210.369206 Hartree

Imaginary Freq= 0

-1 1

|   |             |             |             |
|---|-------------|-------------|-------------|
| C | 0.56676700  | -3.93176200 | 0.56581200  |
| C | -0.12808000 | -2.85494200 | 0.02704500  |
| C | 0.48089000  | -2.03445300 | -0.94342200 |
| C | 1.79915900  | -2.35695100 | -1.37227800 |

|   |             |             |             |
|---|-------------|-------------|-------------|
| C | 2.47674800  | -3.45399500 | -0.81078200 |
| C | 1.87012000  | -4.24498400 | 0.15679100  |
| H | 0.07995400  | -4.53847400 | 1.32657900  |
| H | -1.12729400 | -2.61505300 | 0.37097300  |
| H | 3.48212900  | -3.67394400 | -1.15874900 |
| H | 2.39838700  | -5.09307500 | 0.58334700  |
| C | 2.43876500  | -1.60596800 | -2.40807400 |
| N | 3.01043100  | -1.06058800 | -3.26420500 |
| O | -0.08773100 | -0.96973200 | -1.51182600 |
| C | -1.49698100 | -0.74935000 | -1.38603300 |
| H | -2.53330600 | -1.08951200 | 0.37300000  |
| C | -1.94296800 | 0.57723300  | -1.54306200 |
| C | -3.28995600 | 0.78563400  | -2.00202500 |
| C | -1.20471500 | 1.77982400  | -1.20699900 |
| C | -3.84631200 | 2.03511400  | -2.14881300 |
| H | -3.87792100 | -0.09589100 | -2.25160600 |
| C | -1.81072300 | 3.04943900  | -1.38800600 |
| C | -3.10352800 | 3.20173100  | -1.85385300 |
| H | -4.86876000 | 2.12207800  | -2.51474100 |
| H | -1.21592300 | 3.92365000  | -1.13201800 |
| H | -3.53848200 | 4.18956200  | -1.98065200 |
| C | 0.08455600  | 1.76238600  | -0.62582300 |
| C | 1.17156800  | 1.85820400  | -0.07219000 |



|   |             |             |             |
|---|-------------|-------------|-------------|
| C | 2.43224900  | 1.95043700  | 0.56577300  |
| C | 2.98918400  | 3.20866500  | 0.89828900  |
| C | 3.17530400  | 0.79254600  | 0.89873600  |
| C | 4.22469900  | 3.30029300  | 1.53135000  |
| H | 2.43227700  | 4.10732800  | 0.64843300  |
| C | 4.40929000  | 0.89612300  | 1.53253100  |
| H | 2.76663700  | -0.18102700 | 0.64740200  |
| C | 4.94573300  | 2.14686100  | 1.85545200  |
| H | 4.62954100  | 4.28087500  | 1.77458200  |
| H | 4.96037100  | -0.01009800 | 1.77518500  |
| H | 5.91131000  | 2.22148000  | 2.35001100  |
| H | -2.05217500 | -1.53154900 | -1.90667900 |
| O | -3.05665900 | -1.49078200 | 1.11932400  |
| C | -3.04379500 | -0.60258300 | 2.23913400  |
| C | -3.85152600 | 0.66503100  | 1.90837200  |
| H | -3.91015700 | 1.34054400  | 2.77225400  |
| H | -3.39248700 | 1.21089700  | 1.07776700  |
| H | -4.87052700 | 0.39178800  | 1.61101200  |
| C | -1.59998400 | -0.23570900 | 2.62346800  |
| H | -1.57606700 | 0.41395600  | 3.50817300  |
| H | -1.02410100 | -1.14151700 | 2.84514400  |
| H | -1.09895600 | 0.29193700  | 1.80449700  |
| C | -3.71793000 | -1.38283300 | 3.37514400  |

|   |             |             |            |
|---|-------------|-------------|------------|
| H | -3.77547600 | -0.78213100 | 4.29115000 |
| H | -4.73397600 | -1.67224700 | 3.08296900 |
| H | -3.15411600 | -2.29729000 | 3.59219600 |

#### INT\_end4

E(B3lyp/6-31g(d) = -1210.390572 Hartree

Imaginary Freq= 0

-1 1

|   |             |             |             |
|---|-------------|-------------|-------------|
| C | -4.80683400 | -2.71889600 | 0.89932000  |
| C | -4.76091500 | -1.36782500 | 0.54334300  |
| C | -3.52872500 | -0.86991400 | 0.13569600  |
| C | -2.36524700 | -1.65343000 | 0.07421600  |
| C | -2.42800600 | -3.00509500 | 0.43490700  |
| C | -3.65396200 | -3.52639500 | 0.84532000  |
| H | -5.75042800 | -3.15211600 | 1.22368300  |
| H | -5.64066600 | -0.73167000 | 0.58032600  |
| H | -1.52970900 | -3.61367000 | 0.39131000  |
| H | -3.72635000 | -4.57372800 | 1.13124500  |
| C | -1.29659700 | -0.78908300 | -0.39232200 |
| N | -0.02297400 | -1.27886700 | -0.56009300 |
| O | -3.26012600 | 0.40335900  | -0.25148600 |
| C | -1.89017900 | 0.44838500  | -0.57072700 |
| C | -1.40881800 | 1.74004900  | -1.06022400 |

|   |             |             |             |
|---|-------------|-------------|-------------|
| C | -2.30964600 | 2.78656000  | -1.25918500 |
| C | -0.01732500 | 1.92600300  | -1.33550800 |
| C | -1.89446500 | 4.04718100  | -1.72442300 |
| H | -3.35870200 | 2.61196100  | -1.04347900 |
| C | 0.36194700  | 3.19547400  | -1.80748300 |
| C | -0.54995800 | 4.24375700  | -1.99698000 |
| H | -2.62149800 | 4.84400400  | -1.86330200 |
| H | 1.41521200  | 3.36556600  | -2.02255100 |
| H | -0.19113200 | 5.20658400  | -2.35734900 |
| C | 1.03047500  | 0.91764300  | -1.16756200 |
| C | 0.97828000  | -0.46235100 | -0.91424200 |
| C | 2.28321200  | -1.20369400 | -1.06132600 |
| C | 2.26905100  | -2.51506900 | -1.56595600 |
| C | 3.52421000  | -0.65002800 | -0.70322900 |
| C | 3.45091100  | -3.23119600 | -1.74720700 |
| H | 1.30524500  | -2.95285700 | -1.80272100 |
| C | 4.70742800  | -1.37176900 | -0.87320700 |
| H | 3.55791500  | 0.33145200  | -0.24099800 |
| C | 4.68062700  | -2.66180000 | -1.40570500 |
| H | 3.41273400  | -4.24060700 | -2.15327600 |
| H | 5.65397200  | -0.92462300 | -0.57538300 |
| H | 5.60414400  | -3.22160600 | -1.54066700 |
| H | 1.99642000  | 1.27142800  | -1.52005500 |

|   |             |             |            |
|---|-------------|-------------|------------|
| H | 1.77106100  | 1.44808600  | 0.81491700 |
| C | 1.72317200  | 1.24111200  | 2.78306300 |
| C | 0.27600700  | 1.74487900  | 2.91905400 |
| H | 0.25345100  | 2.83984700  | 2.88185000 |
| H | -0.34205600 | 1.36388200  | 2.09850800 |
| H | -0.17693700 | 1.41681000  | 3.86383400 |
| C | 1.76214100  | -0.29713400 | 2.78267900 |
| H | 1.16376400  | -0.70876000 | 1.96191000 |
| H | 2.79308600  | -0.64686600 | 2.65727000 |
| H | 1.36990000  | -0.70311100 | 3.72470300 |
| C | 2.59511100  | 1.79900500  | 3.91464600 |
| H | 2.23551300  | 1.46316400  | 4.89482100 |
| H | 3.63198600  | 1.46624700  | 3.79055500 |
| H | 2.58535100  | 2.89479200  | 3.89478900 |
| O | 2.30477300  | 1.75909500  | 1.58260700 |

### INT\_end5

E(B3lyp/6-31g(d) = -976.709065 Hartree

Imaginary Freq=0

-1 1

|   |            |             |             |
|---|------------|-------------|-------------|
| C | 6.25770200 | 0.52949100  | 0.67072700  |
| C | 5.65758300 | -0.33598600 | -0.25065800 |
| C | 4.27737500 | -0.24685300 | -0.40203600 |

|   |             |             |             |
|---|-------------|-------------|-------------|
| C | 3.50749400  | 0.66821700  | 0.32891600  |
| C | 4.11796800  | 1.52595900  | 1.24375800  |
| C | 5.50256000  | 1.45083500  | 1.41107600  |
| H | 7.33469100  | 0.48308100  | 0.81409500  |
| H | 6.23576500  | -1.05049100 | -0.82810400 |
| H | 3.51289900  | 2.23220700  | 1.80471000  |
| H | 5.99987000  | 2.10807400  | 2.11938900  |
| C | 2.12557400  | 0.50752400  | -0.11044900 |
| N | 1.12529700  | 1.23098800  | 0.22974800  |
| O | 3.54335200  | -1.00884500 | -1.26197800 |
| C | 2.13968200  | -0.66360600 | -1.09095000 |
| C | 1.33477700  | -1.81734900 | -0.54441100 |
| C | 1.88308900  | -3.09074500 | -0.36751000 |
| C | -0.03705800 | -1.58530700 | -0.28342200 |
| C | 1.07118300  | -4.15584400 | 0.01954400  |
| H | 2.93798100  | -3.24476600 | -0.56971700 |
| C | -0.85557800 | -2.69270300 | 0.04710100  |
| C | -0.30337600 | -3.95699700 | 0.20472700  |
| H | 1.50439700  | -5.14670700 | 0.14064900  |
| H | -1.92688200 | -2.49184100 | 0.14546600  |
| H | -0.94351000 | -4.79597900 | 0.46911200  |
| C | -0.70527000 | -0.29728000 | -0.35635900 |
| C | -0.18399700 | 0.96025900  | -0.17442000 |

|   |             |             |             |
|---|-------------|-------------|-------------|
| C | -1.06383200 | 2.16297800  | -0.24063600 |
| C | -2.44483900 | 2.05959700  | -0.51361100 |
| C | -0.51468500 | 3.44463000  | -0.05430200 |
| C | -3.22799300 | 3.21009400  | -0.59319800 |
| H | -2.92291700 | 1.08337300  | -0.63667700 |
| C | -1.30702200 | 4.58900900  | -0.13968500 |
| H | 0.54447600  | 3.52977300  | 0.16428700  |
| C | -2.67117600 | 4.47923600  | -0.41180400 |
| H | -4.29171500 | 3.10616300  | -0.79660000 |
| H | -0.85451300 | 5.56818500  | 0.00748500  |
| H | -3.29319700 | 5.36977000  | -0.47945900 |
| H | 1.75134000  | -0.35229200 | -2.07145400 |
| C | -4.70045400 | -1.13389100 | 0.37953400  |
| C | -5.21759800 | -2.60639900 | 0.41337000  |
| H | -4.46278700 | -3.25045800 | 0.88455000  |
| H | -6.16670500 | -2.73646400 | 0.95928300  |
| H | -5.35686500 | -2.95963700 | -0.61642900 |
| C | -4.47481000 | -0.67027800 | 1.85199000  |
| H | -3.68928300 | -1.28531300 | 2.31039300  |
| H | -4.12445100 | 0.36964100  | 1.85740200  |
| H | -5.37550700 | -0.73454700 | 2.48507700  |
| C | -5.83572700 | -0.25410500 | -0.23261900 |
| H | -5.53106100 | 0.80097000  | -0.22266300 |

|   |             |             |             |
|---|-------------|-------------|-------------|
| H | -5.98723300 | -0.54543700 | -1.27984100 |
| H | -6.79964500 | -0.33499400 | 0.29628700  |
| O | -3.56377500 | -1.04355800 | -0.36268000 |
| H | -1.79826200 | -0.40290900 | -0.39625600 |

### INT\_end3

E(B3lyp/6-31g(d) = -1210.379707 Hartree

Imaginary Freq= 0

-1 1

|   |             |             |             |
|---|-------------|-------------|-------------|
| C | -4.09455500 | -2.92924600 | -0.14681100 |
| C | -3.88684300 | -1.88970200 | 0.77038400  |
| C | -2.68405100 | -1.19645600 | 0.69214100  |
| C | -1.70243800 | -1.51218300 | -0.26095100 |
| C | -1.92005200 | -2.55229200 | -1.16372300 |
| C | -3.12563200 | -3.25934700 | -1.10320000 |
| H | -5.02753800 | -3.48775900 | -0.11175700 |
| H | -4.63078600 | -1.62731000 | 1.51682800  |
| H | -1.15338700 | -2.79535800 | -1.89413600 |
| H | -3.31383700 | -4.07057400 | -1.80258300 |
| C | -0.56448000 | -0.63302300 | -0.00780900 |
| N | 0.59985500  | -0.68890600 | -0.54845400 |
| O | -2.32600900 | -0.17347800 | 1.51952700  |
| C | -1.03414700 | 0.34154300  | 1.07221900  |

|   |             |             |             |
|---|-------------|-------------|-------------|
| H | -0.35455900 | 0.34779200  | 1.93716300  |
| C | -1.15945700 | 1.71405500  | 0.44947900  |
| C | -2.37453600 | 2.39870100  | 0.37712100  |
| C | 0.03583500  | 2.24153700  | -0.12580600 |
| C | -2.46033300 | 3.62096000  | -0.29047000 |
| H | -3.25732300 | 1.95825500  | 0.83258700  |
| C | -0.09530400 | 3.49296900  | -0.78983500 |
| C | -1.30999500 | 4.15582200  | -0.89042900 |
| H | -3.40778400 | 4.15443600  | -0.33576700 |
| H | 0.80749600  | 3.91278100  | -1.22778000 |
| H | -1.36677800 | 5.10585000  | -1.42091600 |
| C | 1.34053300  | 1.63425600  | -0.02798700 |
| C | 1.55977900  | 0.28865400  | -0.16092100 |
| C | 2.93723300  | -0.26758000 | -0.04581700 |
| C | 4.02345000  | 0.58186000  | 0.24477200  |
| C | 3.20949900  | -1.64034500 | -0.19955200 |
| C | 5.31415300  | 0.08297600  | 0.38257700  |
| H | 3.79566300  | 1.63967800  | 0.34801100  |
| C | 4.50797200  | -2.13897800 | -0.07390700 |
| H | 2.38484400  | -2.30904300 | -0.42488700 |
| C | 5.57162400  | -1.28474600 | 0.22109000  |
| H | 6.13286800  | 0.76483900  | 0.61062300  |
| H | 4.68752800  | -3.20586100 | -0.20285600 |



H 6.58314900 -1.67417600 0.32304500

**Pro\_2**

E(B3lyp/6-31g(d) = -1210.471525 Hartree

Imaginary Freq= 0

-1 1

C 6.66162000 0.09858100 -0.70863200

C 5.94944700 -0.82082700 0.06629300

C 4.56530700 -0.72196600 0.03968200

C 3.87552900 0.24533000 -0.71965500

C 4.60726500 1.15714500 -1.48800400

C 5.99911300 1.07364100 -1.47473900

H 7.74786600 0.05700000 -0.71719000

H 6.44644200 -1.57910700 0.66342400

H 4.09099200 1.90891500 -2.07751100

H 6.58462600 1.77353300 -2.06575400

C 2.47148000 -0.00188400 -0.46150400

N 1.37050600 0.64266700 -0.92577600

O 3.69559800 -1.53268500 0.73263900

C 2.43106200 -1.07514300 0.40995700

C 1.21308400 -1.61060400 0.87191800

C 1.10131500 -2.71480500 1.74756100

C 0.03962500 -0.94749100 0.36819000

|   |             |             |             |
|---|-------------|-------------|-------------|
| C | -0.15093500 | -3.16606000 | 2.11228200  |
| H | 2.00487800  | -3.19293100 | 2.11495100  |
| C | -1.23224300 | -1.45496700 | 0.74815100  |
| C | -1.30872500 | -2.54065400 | 1.60451400  |
| H | -0.24370600 | -4.01590000 | 2.78595800  |
| H | -2.17240000 | -1.04407600 | 0.33724900  |
| H | -2.29039500 | -2.91971000 | 1.87899100  |
| C | 0.18967100  | 0.19807000  | -0.51619900 |
| C | -1.01357300 | 0.99234700  | -0.98788100 |
| C | -1.38302600 | 2.11488400  | -0.01612500 |
| C | -2.65239000 | 2.13333000  | 0.58198500  |
| C | -0.47480000 | 3.14379400  | 0.27391000  |
| C | -2.99351000 | 3.17247900  | 1.45319400  |
| H | -3.34613200 | 1.31935600  | 0.34133100  |
| C | -0.82246000 | 4.17809200  | 1.14411000  |
| H | 0.51102000  | 3.12421100  | -0.18536800 |
| C | -2.08692800 | 4.19561100  | 1.73865700  |
| H | -3.98014600 | 3.18008800  | 1.91369800  |
| H | -0.10641200 | 4.96993200  | 1.35823800  |
| H | -2.36095100 | 5.00106000  | 2.41821700  |
| H | -0.72655900 | 1.43788100  | -1.94807200 |
| H | -1.90297800 | 0.36152600  | -1.13972800 |
| C | -4.76354500 | -1.12358600 | -1.06795000 |

|   |             |             |             |
|---|-------------|-------------|-------------|
| C | -4.28843800 | -2.37424700 | -1.86609000 |
| H | -3.60007500 | -2.05726400 | -2.65996000 |
| H | -3.73473600 | -3.04708400 | -1.19828400 |
| H | -5.11010800 | -2.94594700 | -2.32738200 |
| C | -5.73766600 | -1.60340900 | 0.04973100  |
| H | -5.19953700 | -2.26533100 | 0.74135200  |
| H | -6.08194200 | -0.73476500 | 0.62558300  |
| H | -6.62151200 | -2.14321500 | -0.32771600 |
| C | -5.55965100 | -0.20401200 | -2.04132800 |
| H | -5.91635700 | 0.67948600  | -1.49639800 |
| H | -4.88847000 | 0.14695900  | -2.83547700 |
| H | -6.42728100 | -0.69577500 | -2.51078900 |
| O | -3.70677600 | -0.45224100 | -0.53027700 |

### Pro\_1

E(B3lyp/6-31g(d) = -1210.456977 Hartree

Imaginary Freq= 0

-1 1

|   |             |             |            |
|---|-------------|-------------|------------|
| C | -6.40026700 | 0.27886300  | 1.01669000 |
| C | -5.68873700 | -0.86239500 | 0.63813800 |
| C | -4.33526800 | -0.69510300 | 0.37528900 |
| C | -3.67469300 | 0.54053300  | 0.48283700 |
| C | -4.40511400 | 1.67473500  | 0.85705300 |

|   |             |             |             |
|---|-------------|-------------|-------------|
| C | -5.76633200 | 1.53051100  | 1.12117500  |
| H | -7.46278500 | 0.19644000  | 1.23161200  |
| H | -6.16295300 | -1.83487000 | 0.54743900  |
| H | -3.91175400 | 2.63904600  | 0.93472800  |
| H | -6.35142900 | 2.39911800  | 1.41376700  |
| C | -2.29085700 | 0.28349400  | 0.13768700  |
| N | -1.35106300 | 1.26808300  | -0.07134300 |
| O | -3.46693500 | -1.67392200 | -0.02088900 |
| C | -2.21840000 | -1.07205200 | -0.14673900 |
| C | -1.11837700 | -1.85569400 | -0.65400100 |
| C | -1.33402300 | -3.00620100 | -1.44037000 |
| C | 0.20410600  | -1.43260400 | -0.37406400 |
| C | -0.25239700 | -3.70077400 | -1.96542000 |
| H | -2.35206600 | -3.32584000 | -1.64345200 |
| C | 1.28702800  | -2.13005200 | -0.92904300 |
| C | 1.05385700  | -3.25697300 | -1.71658600 |
| H | -0.42423500 | -4.58551200 | -2.57553500 |
| H | 2.29653400  | -1.78629800 | -0.66384000 |
| H | 1.89808900  | -3.80895300 | -2.12508300 |
| C | 0.44858500  | -0.28254400 | 0.58327800  |
| C | -0.07696000 | 1.03301400  | 0.02127400  |
| C | 0.85053300  | 2.10928400  | -0.41727000 |
| C | 2.24631600  | 1.92695100  | -0.44526300 |

|   |             |             |             |
|---|-------------|-------------|-------------|
| C | 0.31458300  | 3.34849900  | -0.82754400 |
| C | 3.06722700  | 2.97548800  | -0.87405000 |
| H | 2.72889400  | 0.98366000  | -0.14099000 |
| C | 1.14352000  | 4.38306600  | -1.24294000 |
| H | -0.76289100 | 3.47373800  | -0.80900200 |
| C | 2.53146000  | 4.19981300  | -1.26884700 |
| H | 4.14349700  | 2.81765400  | -0.89282000 |
| H | 0.71082200  | 5.33340400  | -1.55009600 |
| H | 3.18359300  | 5.00769400  | -1.59638100 |
| H | -0.12589300 | -0.47070900 | 1.50450800  |
| H | 1.51845000  | -0.25788000 | 0.83233000  |
| O | 3.49119600  | -0.65493900 | 0.44141300  |
| C | 4.64380400  | -0.90723500 | 1.12407600  |
| C | 5.86285800  | -0.92866300 | 0.15371000  |
| H | 6.82586100  | -1.13610900 | 0.64831400  |
| H | 5.69778400  | -1.69287000 | -0.61675400 |
| H | 5.93800500  | 0.04125800  | -0.35531700 |
| C | 4.57139900  | -2.28889400 | 1.84050200  |
| H | 5.47787000  | -2.54128500 | 2.41448500  |
| H | 3.71438100  | -2.29582700 | 2.52598600  |
| H | 4.40492800  | -3.07817300 | 1.09591900  |
| C | 4.90587100  | 0.18168400  | 2.20652100  |
| H | 5.82499800  | 0.01466100  | 2.79128100  |

|   |            |            |            |
|---|------------|------------|------------|
| H | 4.97902400 | 1.16658200 | 1.72695400 |
| H | 4.05629900 | 0.21489000 | 2.90060200 |

**TS\_exd5**

E(B3lyp/6-31g(d) = -1210.453140 Hartree

Imaginary Freq= -1164.52

-1 1

|   |             |             |             |
|---|-------------|-------------|-------------|
| C | -6.31014000 | 0.40572400  | -1.16793500 |
| C | -5.76919800 | 0.01013400  | 0.05850000  |
| C | -4.38506900 | -0.06791900 | 0.13855900  |
| C | -3.53386000 | 0.22928100  | -0.94639800 |
| C | -4.09569700 | 0.62143700  | -2.16590500 |
| C | -5.48408300 | 0.70722400  | -2.26523900 |
| H | -7.38980300 | 0.48081800  | -1.27275200 |
| H | -6.39429100 | -0.22638400 | 0.91430900  |
| H | -3.45149700 | 0.85104800  | -3.00952400 |
| H | -5.93833800 | 1.01147200  | -3.20520400 |
| C | -2.18641100 | 0.02019800  | -0.44933300 |
| N | -1.00353500 | 0.11222000  | -1.10050200 |
| O | -3.67269000 | -0.43775600 | 1.25267800  |
| C | -2.33917500 | -0.37303000 | 0.87000600  |
| C | -1.22457300 | -0.61278700 | 1.69845600  |
| C | -1.28613100 | -0.93946900 | 3.07394000  |

|   |             |             |             |
|---|-------------|-------------|-------------|
| C | 0.04114700  | -0.44237700 | 1.04481900  |
| C | -0.11972600 | -1.05638600 | 3.80394100  |
| H | -2.25756600 | -1.07659200 | 3.54081900  |
| C | 1.20718900  | -0.51144300 | 1.84390900  |
| C | 1.12822500  | -0.81886500 | 3.19219300  |
| H | -0.16629700 | -1.30359900 | 4.86273800  |
| H | 2.16257900  | -0.25860400 | 1.39662700  |
| H | 2.03724200  | -0.86043200 | 3.78706700  |
| C | 0.10606700  | -0.15534400 | -0.39557600 |
| C | 1.40063200  | -0.08010300 | -1.07683200 |
| C | 2.26763100  | -1.30913800 | -1.12073300 |
| C | 3.64208600  | -1.17362600 | -1.40768300 |
| C | 1.77746600  | -2.61519000 | -0.92965000 |
| C | 4.47264300  | -2.28730700 | -1.51879200 |
| H | 4.04556600  | -0.16827100 | -1.48736000 |
| C | 2.61186100  | -3.73044000 | -1.02571300 |
| H | 0.72151600  | -2.75738400 | -0.71340000 |
| C | 3.96579300  | -3.57679400 | -1.32948100 |
| H | 5.53028700  | -2.14723400 | -1.73800200 |
| H | 2.19682000  | -4.72595300 | -0.87379500 |
| H | 4.61660300  | -4.44549200 | -1.41003100 |
| H | 1.23612100  | 0.29070400  | -2.09582900 |
| H | 2.20454500  | 0.85468900  | -0.51414800 |

|   |            |            |             |
|---|------------|------------|-------------|
| C | 2.97341700 | 2.91421900 | -0.00586000 |
| C | 4.18297600 | 3.55978400 | 0.70872600  |
| H | 4.24364900 | 3.18583500 | 1.73787400  |
| H | 5.10895600 | 3.27346800 | 0.19531200  |
| H | 4.12376500 | 4.65834000 | 0.73821100  |
| C | 2.90721500 | 3.44515000 | -1.46097900 |
| H | 3.81758300 | 3.15337000 | -1.99907500 |
| H | 2.05202400 | 3.00239900 | -1.98528200 |
| H | 2.80901100 | 4.54008700 | -1.51175700 |
| C | 1.67580400 | 3.31604100 | 0.73988600  |
| H | 0.80046900 | 2.88232700 | 0.24233100  |
| H | 1.70455500 | 2.92534600 | 1.76388400  |
| H | 1.53503100 | 4.40636400 | 0.78685200  |
| O | 3.16264700 | 1.53704200 | 0.01140800  |

## INT\_8

E(B3lyp/6-31g(d) = -1210.470505 Hartree

Imaginary Freq= 0

-1 1

|   |             |            |             |
|---|-------------|------------|-------------|
| C | -2.31299300 | 4.50440600 | -1.00295100 |
| C | -3.16880600 | 3.44444600 | -0.69685400 |
| C | -2.57974400 | 2.19989400 | -0.50260400 |
| C | -1.19667000 | 1.97108400 | -0.60142300 |



|   |             |             |             |
|---|-------------|-------------|-------------|
| C | -0.35079800 | 3.04967900  | -0.90610600 |
| C | -0.92270300 | 4.30610800  | -1.10257000 |
| H | -2.72828400 | 5.49726400  | -1.16222000 |
| H | -4.24404500 | 3.57420100  | -0.61233200 |
| H | 0.72366500  | 2.90363200  | -0.95221900 |
| H | -0.28171000 | 5.15367400  | -1.33617400 |
| C | -0.98926900 | 0.55142500  | -0.34625800 |
| N | 0.26541100  | -0.02003500 | -0.38332200 |
| O | -3.23271700 | 1.05028500  | -0.20305400 |
| C | -2.25479700 | 0.04406600  | -0.10708600 |
| C | -2.77641400 | -1.27506600 | 0.24292600  |
| C | -4.11512500 | -1.42172100 | 0.61043900  |
| C | -1.92427900 | -2.41896200 | 0.18135600  |
| C | -4.66543500 | -2.67787600 | 0.92312800  |
| H | -4.74294300 | -0.53739000 | 0.64058200  |
| C | -2.50396300 | -3.65899500 | 0.49965100  |
| C | -3.85192400 | -3.79815000 | 0.86323200  |
| H | -5.71418000 | -2.75800300 | 1.20052700  |
| H | -1.87294500 | -4.54493400 | 0.45182100  |
| H | -4.24764500 | -4.78606000 | 1.09351700  |
| C | -0.51698200 | -2.39817800 | -0.20634100 |
| C | 0.39847000  | -1.37252400 | -0.38371200 |
| C | 1.80645100  | -1.81697500 | -0.68031700 |

|   |             |             |             |
|---|-------------|-------------|-------------|
| C | 2.38258800  | -2.94172900 | -0.06482000 |
| C | 2.59267500  | -1.09961800 | -1.59769500 |
| C | 3.68173000  | -3.34872400 | -0.37016000 |
| H | 1.80586300  | -3.48760500 | 0.67609000  |
| C | 3.88852600  | -1.50785000 | -1.90987800 |
| H | 2.16624900  | -0.21451700 | -2.05581300 |
| C | 4.44168700  | -2.63652400 | -1.30011800 |
| H | 4.10467700  | -4.21867500 | 0.12891200  |
| H | 4.47170500  | -0.93740700 | -2.62996800 |
| H | 5.45600200  | -2.95053000 | -1.53840700 |
| H | 1.70475800  | 1.04345300  | -0.03150100 |
| H | -0.11444300 | -3.39690500 | -0.35161200 |
| C | 2.82488900  | 1.81665400  | 1.43529100  |
| C | 3.44652700  | 0.49855100  | 1.93519200  |
| H | 2.71504000  | -0.31394300 | 1.87578000  |
| H | 4.30021400  | 0.22387400  | 1.30613000  |
| H | 3.78766500  | 0.58041200  | 2.97646200  |
| C | 3.86588400  | 2.94355200  | 1.48563500  |
| H | 4.72169400  | 2.69241500  | 0.84845600  |
| H | 3.42875400  | 3.87703500  | 1.11313000  |
| H | 4.22796200  | 3.11027900  | 2.50801300  |
| C | 1.59798400  | 2.18402300  | 2.29068200  |
| H | 1.14862200  | 3.11562500  | 1.92973000  |

|   |            |            |            |
|---|------------|------------|------------|
| H | 0.83932200 | 1.39730100 | 2.22091100 |
| H | 1.86735400 | 2.31181500 | 3.34796400 |
| O | 2.46193300 | 1.69462100 | 0.06600900 |

### INT\_7

E(B3lyp/6-31g(d) = -1210.429413 Hartree

Imaginary Freq= 0

-1 1

|   |             |             |             |
|---|-------------|-------------|-------------|
| C | -6.38249000 | 0.53905700  | 0.62150500  |
| C | -5.67682700 | -0.66514400 | 0.68576400  |
| C | -4.32989100 | -0.62263800 | 0.35286100  |
| C | -3.66607800 | 0.55958500  | -0.03297400 |
| C | -4.39231400 | 1.75948100  | -0.08891600 |
| C | -5.74608600 | 1.73444500  | 0.23968900  |
| H | -7.44002900 | 0.55131700  | 0.87201500  |
| H | -6.15030200 | -1.59619500 | 0.98179700  |
| H | -3.91135600 | 2.69252900  | -0.37280500 |
| H | -6.32211700 | 2.65584900  | 0.20498400  |
| C | -2.30619500 | 0.16485400  | -0.30158000 |
| N | -1.28599700 | 0.99396400  | -0.75460800 |
| O | -3.46857500 | -1.67418900 | 0.35484100  |
| C | -2.23011500 | -1.18283000 | -0.06309800 |
| C | -1.13894100 | -2.13636400 | -0.21204400 |

|   |             |             |             |
|---|-------------|-------------|-------------|
| C | -1.42204700 | -3.50621000 | -0.31397000 |
| C | 0.20818300  | -1.68701200 | -0.25437200 |
| C | -0.39675100 | -4.43930600 | -0.47472100 |
| H | -2.45613400 | -3.83400000 | -0.26455300 |
| C | 1.22718400  | -2.64441300 | -0.41747300 |
| C | 0.92734300  | -4.00287500 | -0.53270600 |
| H | -0.63705100 | -5.49762500 | -0.55229600 |
| H | 2.25487000  | -2.26592500 | -0.43775800 |
| H | 1.73511300  | -4.72140700 | -0.65583100 |
| C | 0.67929600  | -0.30261600 | -0.08843500 |
| C | 0.06807200  | 0.87466700  | -0.34813900 |
| C | 0.81032600  | 2.15970400  | -0.25758400 |
| C | 2.21509300  | 2.18413700  | -0.40999500 |
| C | 0.14007000  | 3.37902200  | -0.04210100 |
| C | 2.89653100  | 3.39773400  | -0.35225100 |
| H | 2.77989400  | 1.24984800  | -0.54138100 |
| C | 0.83409400  | 4.58942700  | 0.00619200  |
| H | -0.93336100 | 3.38612800  | 0.13473600  |
| C | 2.21856500  | 4.60569000  | -0.15559500 |
| H | 3.97830200  | 3.39494100  | -0.46789400 |
| H | 0.28934300  | 5.51536500  | 0.18073500  |
| H | 2.76438100  | 5.54658000  | -0.12334200 |
| H | -1.56951700 | 1.89879700  | -1.09483800 |

|   |            |             |             |
|---|------------|-------------|-------------|
| H | 1.73352200 | -0.26267600 | 0.20854100  |
| C | 4.84310100 | -0.73625800 | 0.41087800  |
| C | 5.05787900 | -2.19430000 | 0.92187300  |
| H | 4.26456900 | -2.44612100 | 1.63739400  |
| H | 4.97726200 | -2.89141600 | 0.07708100  |
| H | 6.03193200 | -2.35802100 | 1.41171600  |
| C | 5.97886500 | -0.41760100 | -0.61029300 |
| H | 5.87040400 | -1.07590400 | -1.48185900 |
| H | 5.87036900 | 0.61639300  | -0.96407100 |
| H | 6.99719000 | -0.53912400 | -0.20490900 |
| C | 5.00937700 | 0.22011800  | 1.63149800  |
| H | 4.88456600 | 1.26064400  | 1.30444700  |
| H | 4.22094400 | 0.00966500  | 2.36547000  |
| H | 5.98570300 | 0.13412300  | 2.13678500  |
| O | 3.62182600 | -0.59626500 | -0.17433700 |

## INT\_5

E(B3lyp/6-31g(d) = -976.709065 Hartree

Imaginary Freq=0

-1 1

|   |            |             |             |
|---|------------|-------------|-------------|
| C | 3.18856300 | -3.84292900 | -0.33705700 |
| C | 3.48391800 | -2.52640200 | -0.71295400 |
| C | 2.56594800 | -1.54714400 | -0.36590100 |

|   |             |             |             |
|---|-------------|-------------|-------------|
| C | 1.36767700  | -1.81862400 | 0.33293500  |
| C | 1.09358500  | -3.14612300 | 0.70443900  |
| C | 2.00690600  | -4.14342500 | 0.36214800  |
| H | 3.88379500  | -4.64014700 | -0.58874800 |
| H | 4.38981500  | -2.27263800 | -1.25603000 |
| H | 0.18483600  | -3.39647600 | 1.24770800  |
| H | 1.80139400  | -5.17459300 | 0.64177800  |
| C | 0.72017600  | -0.54619800 | 0.50585300  |
| N | -0.47344100 | -0.27178200 | 1.18589400  |
| O | 2.66719200  | -0.22069300 | -0.64205700 |
| C | 1.52948000  | 0.39677700  | -0.09970300 |
| C | 1.44686300  | 1.83665400  | -0.14870000 |
| C | 2.60454000  | 2.61172300  | -0.36882500 |
| C | 0.18066100  | 2.47302400  | 0.12891800  |
| C | 2.59304300  | 3.98739500  | -0.17844400 |
| H | 3.52806900  | 2.10720700  | -0.64254300 |
| C | 0.23408100  | 3.87633300  | 0.36759400  |
| C | 1.40009000  | 4.61128400  | 0.23662800  |
| H | 3.49840500  | 4.57097500  | -0.33282500 |
| H | -0.70573300 | 4.37198000  | 0.60377900  |
| H | 1.38455000  | 5.68607100  | 0.41570900  |
| C | -1.08386400 | 1.81740900  | 0.01339800  |
| C | -1.41760600 | 0.58935500  | 0.42847300  |

|   |             |             |             |
|---|-------------|-------------|-------------|
| C | -2.72102900 | -0.02903000 | 0.09899600  |
| C | -3.80044800 | 0.80246800  | -0.28108300 |
| C | -2.97499000 | -1.41628600 | 0.13858500  |
| C | -5.04645600 | 0.28082100  | -0.60080600 |
| H | -3.59751000 | 1.86878100  | -0.31953300 |
| C | -4.23027200 | -1.94116000 | -0.18105200 |
| H | -2.17242200 | -2.10851000 | 0.37996400  |
| C | -5.27945300 | -1.10116000 | -0.54922600 |
| H | -5.85182600 | 0.95541200  | -0.88842400 |
| H | -4.38064300 | -3.01932400 | -0.14810900 |
| H | -6.25856600 | -1.50916500 | -0.79172300 |
| H | -0.89608000 | -1.12014200 | 1.54890800  |

#### INT\_4

E(B3lyp/6-31g(d) = -1210.430706 Hartree

Imaginary Freq= 0

-1 1

|   |             |             |             |
|---|-------------|-------------|-------------|
| C | -4.74685300 | -2.44686100 | -0.84356100 |
| C | -4.41508200 | -1.29736200 | -0.12268200 |
| C | -3.22418500 | -0.65452200 | -0.45782300 |
| C | -2.36742600 | -1.12994300 | -1.46064900 |
| C | -2.71635500 | -2.27871000 | -2.17027700 |
| C | -3.90867300 | -2.93698600 | -1.85891400 |

|   |             |             |             |
|---|-------------|-------------|-------------|
| H | -5.67204200 | -2.97091000 | -0.61229200 |
| H | -5.05482800 | -0.90955500 | 0.66512200  |
| H | -2.06120600 | -2.65869400 | -2.95252200 |
| H | -4.19058800 | -3.83646200 | -2.40159700 |
| C | -1.22173700 | -0.19360100 | -1.55376700 |
| N | -0.25059600 | -0.17719700 | -2.43002700 |
| O | -2.74642500 | 0.46414900  | 0.12288900  |
| C | -1.46245200 | 0.74750900  | -0.48056700 |
| H | -0.19800000 | -0.68777600 | 0.83630300  |
| C | -0.99851800 | 2.07519200  | -0.25516000 |
| C | -1.89179600 | 3.07968000  | 0.22657800  |
| C | 0.36457600  | 2.49154200  | -0.48268000 |
| C | -1.51490300 | 4.40425700  | 0.35259500  |
| H | -2.90974700 | 2.78435200  | 0.45558600  |
| C | 0.70447900  | 3.85893700  | -0.38039900 |
| C | -0.21294400 | 4.81958200  | 0.01834600  |
| H | -2.24643700 | 5.13470900  | 0.69587500  |
| H | 1.73617500  | 4.13706900  | -0.58277800 |
| H | 0.07991500  | 5.86320700  | 0.10381100  |
| C | 1.42163100  | 1.56277600  | -0.64564000 |
| C | 2.38007500  | 0.80872400  | -0.67180400 |
| C | 3.44754400  | -0.12495300 | -0.69705900 |
| C | 3.26484200  | -1.43307800 | -0.18966100 |



|   |             |             |             |
|---|-------------|-------------|-------------|
| C | 4.71615200  | 0.22271500  | -1.21212400 |
| C | 4.31455100  | -2.34653900 | -0.20850300 |
| H | 2.29568700  | -1.69822600 | 0.22365200  |
| C | 5.75812400  | -0.70117500 | -1.22426500 |
| H | 4.86542100  | 1.22459400  | -1.60508100 |
| C | 5.56614200  | -1.99193500 | -0.72426800 |
| H | 4.15483500  | -3.34818500 | 0.18564700  |
| H | 6.72648200  | -0.41213700 | -1.62856500 |
| H | 6.38119000  | -2.71224000 | -0.73542900 |
| H | -0.38410700 | -0.96205100 | -3.07761900 |
| C | 0.01518400  | -0.99155200 | 2.77959400  |
| C | -1.47899800 | -0.94623200 | 3.14652500  |
| H | -2.00531000 | -0.21886300 | 2.51951900  |
| H | -1.93565600 | -1.92818300 | 2.97808800  |
| H | -1.62572200 | -0.66844100 | 4.19898900  |
| C | 0.73514300  | -2.07417600 | 3.59211100  |
| H | 0.29501000  | -3.05610800 | 3.38444800  |
| H | 1.79533700  | -2.11105800 | 3.31812900  |
| H | 0.65860400  | -1.87724100 | 4.66839900  |
| C | 0.67259100  | 0.37975500  | 3.00625000  |
| H | 1.72392000  | 0.34936800  | 2.70175900  |
| H | 0.17382000  | 1.15140800  | 2.40998200  |
| H | 0.61996100  | 0.67704400  | 4.06209800  |

O 0.16202300 -1.39458800 1.41529700

### INT\_3

E(B3lyp/6-31g(d) = -1210.379707 Hartree

Imaginary Freq= 0

-1 1

C -4.93399700 0.13798000 -1.76280800

C -4.11745000 -0.97644700 -1.99186000

C -2.86428000 -0.97122300 -1.38799800

C -2.42589700 0.08367700 -0.58618100

C -3.23952600 1.19883300 -0.36440400

C -4.50370900 1.20766700 -0.96588700

H -5.92218800 0.16933500 -2.21875100

H -4.43603500 -1.80807600 -2.61385900

H -2.83867800 2.02187200 0.24667300

H -5.16285600 2.05993100 -0.81577100

C -1.05077400 -0.23166000 -0.13434000

N -0.20153700 0.41907600 0.54229500

O -1.94874700 -1.98551400 -1.52267600

C -0.76942900 -1.64301400 -0.74600500

H 0.07175200 -1.56769400 -1.44307300

C -0.49453600 -2.74185500 0.25921300

C -1.53853100 -3.52724800 0.75611400

|   |             |             |             |
|---|-------------|-------------|-------------|
| C | 0.82470100  | -3.00146600 | 0.70844700  |
| C | -1.30321200 | -4.54946000 | 1.67489000  |
| H | -2.54523400 | -3.33725200 | 0.40026700  |
| C | 1.05082900  | -4.04352100 | 1.62947300  |
| C | -0.00283200 | -4.81208300 | 2.11140400  |
| H | -2.13562200 | -5.14227400 | 2.04653900  |
| H | 2.06795500  | -4.23023700 | 1.96169300  |
| H | 0.18882600  | -5.60999400 | 2.82474000  |
| C | 1.91905300  | -2.21083800 | 0.25381200  |
| C | 2.82954700  | -1.49929300 | -0.12392200 |
| C | 3.73848500  | -0.46904400 | -0.50795500 |
| C | 5.07308300  | -0.73261300 | -0.86636300 |
| C | 3.26805900  | 0.86148400  | -0.51888700 |
| C | 5.91979400  | 0.31261900  | -1.23079300 |
| H | 5.43376000  | -1.75749900 | -0.85638500 |
| C | 4.12387000  | 1.89710100  | -0.88384000 |
| H | 2.23640800  | 1.04600200  | -0.22720700 |
| C | 5.44886700  | 1.62810000  | -1.24176600 |
| H | 6.95008000  | 0.10000800  | -1.50716700 |
| H | 3.75227100  | 2.91847900  | -0.88511100 |
| H | 6.11261400  | 2.44106200  | -1.52671600 |
| C | -0.73432100 | 4.00411900  | 1.16477200  |
| C | -1.72812300 | 5.15432900  | 1.50222700  |

|   |             |            |             |
|---|-------------|------------|-------------|
| H | -1.27111100 | 6.15726800 | 1.48794800  |
| H | -2.55709600 | 5.14303900 | 0.78238600  |
| H | -2.15359100 | 4.97948000 | 2.49860400  |
| C | 0.44282000  | 4.06883600 | 2.18326600  |
| H | 0.05497400  | 3.87920700 | 3.19210900  |
| H | 1.16903300  | 3.27768200 | 1.95645400  |
| H | 0.97444700  | 5.03453700 | 2.18882200  |
| C | -0.15887300 | 4.26558200 | -0.26088900 |
| H | 0.35494900  | 5.23556200 | -0.36468900 |
| H | 0.55379300  | 3.47097400 | -0.51926200 |
| H | -0.97386600 | 4.22721800 | -0.99520200 |
| O | -1.37212000 | 2.80063600 | 1.23848400  |
| H | -0.58860900 | 1.37349600 | 0.84610500  |

### TS\_1

E(B3lyp/6-31g(d) = -1210.350781 Hartree

Imaginary Freq= -1006.20

-1 1

|   |             |             |             |
|---|-------------|-------------|-------------|
| C | -1.53460500 | -3.69159700 | -1.28774600 |
| C | -1.47418000 | -2.31115900 | -1.13552400 |
| C | -0.50726200 | -1.72931400 | -0.28357800 |
| C | 0.35160000  | -2.60101900 | 0.44722000  |
| C | 0.27180000  | -3.99275100 | 0.26374100  |

|   |             |             |             |
|---|-------------|-------------|-------------|
| C | -0.65447300 | -4.54618000 | -0.61158400 |
| H | -2.29463200 | -4.11051300 | -1.94402100 |
| H | -2.21059400 | -1.67352500 | -1.60839000 |
| H | 0.94603900  | -4.62699500 | 0.83266600  |
| H | -0.70820900 | -5.62263300 | -0.74759100 |
| C | 1.27581500  | -2.09496100 | 1.41314000  |
| N | 2.03603400  | -1.76384900 | 2.23184300  |
| O | -0.34408500 | -0.42256700 | -0.11796100 |
| C | -1.26992900 | 0.48539700  | -0.79403400 |
| H | -2.70251900 | 0.23464300  | -0.59846700 |
| C | -0.93328500 | 1.89767800  | -0.50972100 |
| C | -1.98907200 | 2.81836900  | -0.71517100 |
| C | 0.31372300  | 2.43460000  | -0.06716200 |
| C | -1.85194700 | 4.17709600  | -0.46935900 |
| H | -2.94434100 | 2.40765100  | -1.03206100 |
| C | 0.41867700  | 3.81792200  | 0.22112000  |
| C | -0.64306200 | 4.68705500  | 0.02619100  |
| H | -2.69894300 | 4.84112800  | -0.63257700 |
| H | 1.37621000  | 4.19192300  | 0.57504700  |
| H | -0.53411400 | 5.74557100  | 0.25137900  |
| C | 1.52957100  | 1.69360200  | -0.00878800 |
| C | 2.65305900  | 1.22113400  | -0.01343700 |
| C | 3.96170700  | 0.66836500  | -0.06273100 |

|   |             |             |             |
|---|-------------|-------------|-------------|
| C | 5.08790200  | 1.45938300  | 0.25284000  |
| C | 4.17671800  | -0.67193900 | -0.44987800 |
| C | 6.37385500  | 0.93075700  | 0.18148700  |
| H | 4.93370600  | 2.49155900  | 0.55386300  |
| C | 5.46562000  | -1.19182400 | -0.51983900 |
| H | 3.31845600  | -1.29177600 | -0.68496400 |
| C | 6.57195800  | -0.39691600 | -0.20636500 |
| H | 7.22674800  | 1.55862800  | 0.43051800  |
| H | 5.60784000  | -2.22829800 | -0.81710700 |
| H | 7.57690900  | -0.80880000 | -0.26052200 |
| H | -1.20161900 | 0.29024300  | -1.87686400 |
| O | -3.86769200 | 0.13586000  | -0.76353100 |
| C | -4.63380100 | -0.08418300 | 0.38851100  |
| C | -3.94087300 | 0.46748000  | 1.65533700  |
| H | -4.55750300 | 0.32339600  | 2.55380800  |
| H | -2.97992300 | -0.03375700 | 1.81814900  |
| H | -3.74044300 | 1.53897200  | 1.54176500  |
| C | -4.89220200 | -1.59978700 | 0.56833900  |
| H | -5.54064700 | -1.81924500 | 1.42961800  |
| H | -5.36863100 | -2.00042200 | -0.33492300 |
| H | -3.94337100 | -2.12981900 | 0.70823800  |
| C | -5.98637800 | 0.63597600  | 0.19541900  |
| H | -6.67306400 | 0.47707500  | 1.03987400  |

|   |             |            |             |
|---|-------------|------------|-------------|
| H | -5.82086500 | 1.71385000 | 0.08043400  |
| H | -6.47012900 | 0.27263300 | -0.71941900 |

**ST**

E(B3lyp/6-31g(d) = -977.279048 Hartree

Imaginary Freq= 0

0 1

|   |             |             |             |
|---|-------------|-------------|-------------|
| C | -0.52810800 | -3.81727900 | -1.65391400 |
| C | -0.93403600 | -2.48512200 | -1.54853200 |
| C | -1.29155000 | -1.95816100 | -0.30093100 |
| C | -1.24073700 | -2.79559800 | 0.84086800  |
| C | -0.83117500 | -4.13025900 | 0.71101300  |
| C | -0.47281000 | -4.64477500 | -0.53232200 |
| H | -0.25554900 | -4.20759000 | -2.63075100 |
| H | -0.97599400 | -1.86773700 | -2.43772000 |
| H | -0.79970100 | -4.75326300 | 1.59923500  |
| H | -0.15715200 | -5.67908200 | -0.62416500 |
| C | -1.61101200 | -2.28441300 | 2.12557600  |
| N | -1.90779300 | -1.90881500 | 3.18594200  |
| O | -1.69777500 | -0.68704000 | -0.08205500 |
| C | -1.75132100 | 0.22614200  | -1.19356200 |
| H | -2.52206500 | -0.10936500 | -1.89908600 |
| C | -2.07455700 | 1.59488600  | -0.66113300 |

|   |             |             |             |
|---|-------------|-------------|-------------|
| C | -3.38677500 | 2.06799600  | -0.68415500 |
| C | -1.05176900 | 2.41392100  | -0.12151000 |
| C | -3.70735900 | 3.33296200  | -0.18990100 |
| H | -4.16923100 | 1.43372900  | -1.09370300 |
| C | -1.38525500 | 3.68953300  | 0.37262300  |
| C | -2.70062700 | 4.14275800  | 0.33871300  |
| H | -4.73543200 | 3.68237700  | -0.21639500 |
| H | -0.59825700 | 4.31406900  | 0.78329100  |
| H | -2.93977700 | 5.12936800  | 0.72575300  |
| C | 0.30064200  | 1.96752700  | -0.08108300 |
| C | 1.45534100  | 1.58569400  | -0.04747500 |
| C | 2.80581900  | 1.13296800  | -0.00500700 |
| C | 3.84624000  | 2.01319900  | 0.35404600  |
| C | 3.12203200  | -0.20389200 | -0.32093000 |
| C | 5.16358400  | 1.56530500  | 0.39429700  |
| H | 3.60644300  | 3.04319600  | 0.59937700  |
| C | 4.44246700  | -0.64219700 | -0.27820400 |
| H | 2.32304300  | -0.88705600 | -0.59267600 |
| C | 5.46688200  | 0.23853300  | 0.07842900  |
| H | 5.95671000  | 2.25353500  | 0.67363900  |
| H | 4.67327000  | -1.67571300 | -0.52179400 |
| H | 6.49623100  | -0.10772000 | 0.11154500  |
| H | -0.78127500 | 0.23090400  | -1.70315300 |



## RC

E(B3lyp/6-31g(d) = -1210.383901 Hartree

Imaginary Freq= 0

-1 1

|   |             |             |             |
|---|-------------|-------------|-------------|
| C | -2.85657300 | -2.72778400 | 1.00856300  |
| C | -2.19157800 | -1.66373700 | 0.40316500  |
| C | -0.80102600 | -1.74834800 | 0.22405100  |
| C | -0.11500500 | -2.91802600 | 0.64451700  |
| C | -0.81819500 | -3.97443500 | 1.25270500  |
| C | -2.18939100 | -3.88014400 | 1.44405900  |
| H | -3.93459700 | -2.64867700 | 1.13419100  |
| H | -2.77870700 | -0.80485300 | 0.03013000  |
| H | -0.26695000 | -4.85705800 | 1.56474400  |
| H | -2.73381900 | -4.69380900 | 1.91608900  |
| C | 1.29309200  | -3.04765700 | 0.43807700  |
| N | 2.43644700  | -3.20978300 | 0.28082000  |
| O | -0.02491200 | -0.80635700 | -0.35467400 |
| C | -0.55638200 | 0.51418200  | -0.66550900 |
| H | -1.58946000 | 0.46173000  | -1.03852000 |
| C | -0.48666000 | 1.44890300  | 0.52456000  |
| C | -1.67809200 | 1.94300000  | 1.07058400  |
| C | 0.75434000  | 1.86604100  | 1.06982700  |

|   |             |             |             |
|---|-------------|-------------|-------------|
| C | -1.64481300 | 2.82326900  | 2.15568300  |
| H | -2.62078300 | 1.63164700  | 0.59841800  |
| C | 0.76619100  | 2.75424800  | 2.16356700  |
| C | -0.42628800 | 3.22468100  | 2.70611000  |
| H | -2.57844700 | 3.19762600  | 2.57031500  |
| H | 1.72245900  | 3.06675400  | 2.57403400  |
| H | -0.40041700 | 3.90856400  | 3.55219800  |
| C | 2.00425300  | 1.43590800  | 0.52777600  |
| C | 3.09492800  | 1.11414800  | 0.09521900  |
| C | 4.36773700  | 0.71456100  | -0.41130300 |
| C | 5.37759100  | 1.67032000  | -0.64505000 |
| C | 4.63893700  | -0.64259700 | -0.68210000 |
| C | 6.62032500  | 1.28109900  | -1.13861500 |
| H | 5.17053200  | 2.71616500  | -0.43704900 |
| C | 5.88614400  | -1.01995700 | -1.17517000 |
| H | 3.87409600  | -1.38936800 | -0.49061400 |
| C | 6.87995100  | -0.06535100 | -1.40700300 |
| H | 7.38808400  | 2.03098600  | -1.31547500 |
| H | 6.08079800  | -2.07049300 | -1.37600500 |
| H | 7.85077600  | -0.36796100 | -1.79252700 |
| H | 0.11345800  | 0.85717400  | -1.45949000 |
| O | -3.60994200 | 0.65924600  | -0.75576300 |
| C | -4.76628700 | 0.79703100  | -1.46749200 |

|   |             |             |             |
|---|-------------|-------------|-------------|
| C | -6.00690300 | 0.64941200  | -0.53827600 |
| H | -6.97089500 | 0.76351500  | -1.05981200 |
| H | -5.98879900 | -0.33936400 | -0.06116900 |
| H | -5.95415800 | 1.40189900  | 0.25911800  |
| C | -4.86447500 | -0.28209300 | -2.58487600 |
| H | -5.77920500 | -0.20673900 | -3.19450200 |
| H | -3.99706100 | -0.19433400 | -3.25143100 |
| H | -4.83385900 | -1.28193300 | -2.13295100 |
| C | -4.82824900 | 2.19936700  | -2.14111300 |
| H | -5.73970400 | 2.36655800  | -2.73731900 |
| H | -4.77352700 | 2.97754600  | -1.36887500 |
| H | -3.95754600 | 2.32354800  | -2.79748100 |

### TS\_9

E(B3lyp/6-31g(d) = -1210.436616 Hartree

Imaginary Freq= -316.30

-1 1

|   |             |             |            |
|---|-------------|-------------|------------|
| C | -5.68614200 | -1.08951700 | 1.38009600 |
| C | -5.22773600 | 0.13641800  | 0.89009400 |
| C | -3.91576200 | 0.17240400  | 0.43552400 |
| C | -3.06081900 | -0.94033300 | 0.45061600 |
| C | -3.53642000 | -2.16204300 | 0.94390100 |
| C | -4.85011500 | -2.22228500 | 1.40532400 |

|   |             |             |             |
|---|-------------|-------------|-------------|
| H | -6.70624100 | -1.16763500 | 1.74838300  |
| H | -5.85835600 | 1.02008200  | 0.86339300  |
| H | -2.88281800 | -3.02879700 | 0.96096600  |
| H | -5.24047600 | -3.15997600 | 1.79447200  |
| C | -1.79954500 | -0.49374800 | -0.10144200 |
| N | -0.74181400 | -1.37295400 | -0.26032000 |
| O | -3.26826300 | 1.25451000  | -0.08305000 |
| C | -1.97563900 | 0.83889200  | -0.40556200 |
| C | -1.10434100 | 1.84971400  | -0.98513500 |
| C | -1.64353800 | 3.10801800  | -1.30959900 |
| C | 0.26960700  | 1.58526800  | -1.21380300 |
| C | -0.85264400 | 4.12404000  | -1.84039100 |
| H | -2.70119600 | 3.27739900  | -1.13735200 |
| C | 1.04546300  | 2.63838500  | -1.72803500 |
| C | 0.50612200  | 3.88591900  | -2.04057100 |
| H | -1.29339700 | 5.08835100  | -2.08249400 |
| H | 2.11273400  | 2.46681500  | -1.83849700 |
| H | 1.15220600  | 4.66955600  | -2.43096100 |
| C | 1.03262900  | 0.32396600  | -0.91253300 |
| C | 0.44769400  | -1.00950500 | -0.64298600 |
| C | 1.41625700  | -2.14987900 | -0.78008300 |
| C | 2.79469300  | -1.98335800 | -0.54797400 |
| C | 0.93816000  | -3.42241500 | -1.13698200 |

|   |             |             |             |
|---|-------------|-------------|-------------|
| C | 3.65947500  | -3.07250500 | -0.68291700 |
| H | 3.17750200  | -1.01606400 | -0.21360100 |
| C | 1.80923100  | -4.49928400 | -1.28269500 |
| H | -0.12881600 | -3.54293200 | -1.29395100 |
| C | 3.17836700  | -4.32801800 | -1.05743700 |
| H | 4.72073400  | -2.93422700 | -0.48612900 |
| H | 1.42096300  | -5.47413200 | -1.57218100 |
| H | 3.86121800  | -5.16854800 | -1.16768200 |
| H | 1.77353600  | 0.19435000  | -1.71069500 |
| H | 1.87473900  | 0.61858500  | -0.04312400 |
| O | 3.16902000  | 0.98710400  | 0.49699100  |
| C | 3.28008800  | 1.42542700  | 1.80215400  |
| C | 2.56452800  | 0.46787600  | 2.79181800  |
| H | 2.66771400  | 0.77946700  | 3.84264300  |
| H | 1.49387200  | 0.41571600  | 2.55830900  |
| H | 2.97625800  | -0.54379800 | 2.69053900  |
| C | 2.67615500  | 2.84675400  | 1.95638400  |
| H | 2.78297500  | 3.25462100  | 2.97353000  |
| H | 3.16982400  | 3.53006600  | 1.25441900  |
| H | 1.60913400  | 2.82937700  | 1.70388300  |
| C | 4.78514100  | 1.48476600  | 2.17165900  |
| H | 4.96606100  | 1.84671500  | 3.19564700  |
| H | 5.22642500  | 0.48500700  | 2.07423200  |

H 5.30658400 2.14803400 1.47041300

**TS\_7**

E(B3lyp/6-31g(d) = -1210.409020 Hartree

Imaginary Freq= -810.52

-1 1

C 5.87950500 -0.53064600 1.15609300

C 5.13086900 0.64692300 1.24464800

C 3.87740900 0.64448800 0.64925400

C 3.34026600 -0.47741600 -0.01950900

C 4.11026200 -1.64901500 -0.09854000

C 5.37276900 -1.66231000 0.49220900

H 6.86784600 -0.57014800 1.60711300

H 5.50438400 1.53000000 1.75451800

H 3.73107900 -2.53256600 -0.60692900

H 5.97753900 -2.56475100 0.44166600

C 2.04677200 -0.05648500 -0.49617600

N 1.12763600 -0.76653300 -1.26922200

O 3.00027600 1.68327100 0.62549400

C 1.88118200 1.24378300 -0.08920000

C 0.82476300 2.18907500 -0.38945000

C 1.10546800 3.56794600 -0.37728000

C -0.47445300 1.71034200 -0.75445200

|   |             |             |             |
|---|-------------|-------------|-------------|
| C | 0.15711200  | 4.49647000  | -0.79331400 |
| H | 2.09132600  | 3.89782000  | -0.06075600 |
| C | -1.40650200 | 2.68937000  | -1.17613200 |
| C | -1.09881600 | 4.04546300  | -1.21622000 |
| H | 0.39442400  | 5.55834700  | -0.79024700 |
| H | -2.40789100 | 2.34487100  | -1.41767400 |
| H | -1.85224200 | 4.75909600  | -1.54539700 |
| C | -0.97810100 | 0.34168300  | -0.58813900 |
| C | -0.26472400 | -0.78125800 | -0.81025100 |
| C | -0.80975800 | -2.15099000 | -0.61163200 |
| C | -2.19283600 | -2.40720100 | -0.74747000 |
| C | 0.01938200  | -3.25197400 | -0.30982100 |
| C | -2.70254600 | -3.69316400 | -0.59440800 |
| H | -2.86304200 | -1.57475500 | -0.94121200 |
| C | -0.49621000 | -4.54072900 | -0.15806500 |
| H | 1.08308100  | -3.09792800 | -0.14577000 |
| C | -1.86194600 | -4.77498900 | -0.30747100 |
| H | -3.77332800 | -3.85407300 | -0.70623900 |
| H | 0.17708900  | -5.36094200 | 0.08563800  |
| H | -2.26698800 | -5.77891700 | -0.19796900 |
| H | 1.47086400  | -1.67611300 | -1.55037700 |
| H | -2.44130800 | 0.36311800  | -0.29003400 |
| C | -4.15061500 | 0.64108400  | 0.99788800  |

|   |             |             |             |
|---|-------------|-------------|-------------|
| C | -3.94261300 | 2.10542400  | 1.45277500  |
| H | -2.87353100 | 2.33559700  | 1.51447500  |
| H | -4.38765900 | 2.78809600  | 0.71875500  |
| H | -4.39767800 | 2.30697900  | 2.43397500  |
| C | -5.66265900 | 0.35595000  | 0.89188300  |
| H | -6.11112200 | 1.01319300  | 0.13703900  |
| H | -5.82354200 | -0.68024200 | 0.57115200  |
| H | -6.18617600 | 0.51139400  | 1.84654600  |
| C | -3.52227200 | -0.31051700 | 2.04284600  |
| H | -3.67200800 | -1.35351700 | 1.74189900  |
| H | -2.44273200 | -0.13741400 | 2.11027400  |
| H | -3.95927400 | -0.17095400 | 3.04241400  |
| O | -3.60312600 | 0.43694300  | -0.27658200 |

### TS\_3

E(B3lyp/6-31g(d) = -1210.375826 Hartree

Imaginary Freq= -1016.29

-1 1

|   |             |             |             |
|---|-------------|-------------|-------------|
| C | -4.93165100 | 1.22879200  | -1.59933900 |
| C | -4.33174700 | 0.00077500  | -1.90423100 |
| C | -3.07862500 | -0.24813700 | -1.35218700 |
| C | -2.42626400 | 0.66796700  | -0.52753500 |
| C | -3.02616100 | 1.89444600  | -0.23656900 |



|   |             |             |             |
|---|-------------|-------------|-------------|
| C | -4.28932500 | 2.16398800  | -0.77789600 |
| H | -5.91265500 | 1.45630800  | -2.01286800 |
| H | -4.81301200 | -0.73187400 | -2.54654500 |
| H | -2.48059300 | 2.60568200  | 0.38501600  |
| H | -4.77701100 | 3.11229400  | -0.56200900 |
| C | -1.09141400 | 0.10674600  | -0.14965700 |
| N | -0.11162700 | 0.60003200  | 0.45772700  |
| O | -2.37363800 | -1.40525100 | -1.57073600 |
| C | -1.14512700 | -1.35154200 | -0.79575800 |
| H | -0.30961400 | -1.45927200 | -1.49350200 |
| C | -1.13635300 | -2.48442900 | 0.20050000  |
| C | -2.33614200 | -3.01805500 | 0.68641000  |
| C | 0.08421900  | -3.03136500 | 0.67573100  |
| C | -2.34815500 | -4.05967700 | 1.61205900  |
| H | -3.27088500 | -2.61255000 | 0.31519600  |
| C | 0.05835300  | -4.08998800 | 1.60591500  |
| C | -1.14597200 | -4.60232200 | 2.07391100  |
| H | -3.29784200 | -4.45026300 | 1.97071700  |
| H | 1.00392900  | -4.49571100 | 1.95452200  |
| H | -1.14799400 | -5.41726700 | 2.79385400  |
| C | 1.33577200  | -2.51774200 | 0.23190500  |
| C | 2.39720900  | -2.05908200 | -0.14514200 |
| C | 3.50809500  | -1.24923900 | -0.52524700 |

|   |             |             |             |
|---|-------------|-------------|-------------|
| C | 4.77131500  | -1.78340200 | -0.83712700 |
| C | 3.31309000  | 0.14782500  | -0.57938400 |
| C | 5.81918900  | -0.93819800 | -1.19866000 |
| H | 4.91947300  | -2.85902400 | -0.79340600 |
| C | 4.36818000  | 0.98115600  | -0.94034100 |
| H | 2.32932100  | 0.53638300  | -0.31908700 |
| C | 5.62157700  | 0.44393000  | -1.25279700 |
| H | 6.79286700  | -1.35951400 | -1.43915200 |
| H | 4.20999700  | 2.05614100  | -0.97332100 |
| H | 6.44166400  | 1.10005400  | -1.53556000 |
| C | 0.42918300  | 3.83989200  | 1.15625800  |
| C | -0.06185900 | 5.21398300  | 1.66510200  |
| H | 0.70069500  | 6.00190000  | 1.57018900  |
| H | -0.95077400 | 5.52108700  | 1.10018900  |
| H | -0.34989800 | 5.13194600  | 2.72022900  |
| C | 1.68455500  | 3.42344000  | 1.96591000  |
| H | 1.41960000  | 3.33360700  | 3.02648100  |
| H | 2.03813600  | 2.44191900  | 1.62999900  |
| H | 2.51314200  | 4.14235000  | 1.87307900  |
| C | 0.80919500  | 3.96596900  | -0.34285400 |
| H | 1.60876100  | 4.70121200  | -0.52220300 |
| H | 1.14089800  | 2.99424400  | -0.72728900 |
| H | -0.07249200 | 4.26655700  | -0.92233300 |

|   |             |            |            |
|---|-------------|------------|------------|
| O | -0.59394300 | 2.92074200 | 1.33939900 |
| H | -0.32050000 | 1.78524000 | 0.90054400 |

## TS\_2

E(B3lyp/6-31g(d) = -976.675820 Hartree

Imaginary Freq= -110.01

-1 1

|   |             |             |             |
|---|-------------|-------------|-------------|
| C | -4.96234900 | -2.24254600 | 0.43066600  |
| C | -4.29866100 | -1.22282400 | 1.11523000  |
| C | -3.00834400 | -0.86754100 | 0.71119800  |
| C | -2.37931700 | -1.51897000 | -0.35469200 |
| C | -3.05666200 | -2.53891900 | -1.02810500 |
| C | -4.34844800 | -2.90216000 | -0.64160800 |
| H | -5.96846800 | -2.52364000 | 0.73661200  |
| H | -4.75875300 | -0.70044700 | 1.94993900  |
| H | -2.54708000 | -3.03653500 | -1.84971100 |
| H | -4.87438600 | -3.69610200 | -1.16742600 |
| C | -1.00808400 | -1.08370200 | -0.66260500 |
| N | -0.08054000 | -1.40265600 | -1.35552900 |
| O | -2.32742000 | 0.12047600  | 1.34789600  |
| C | -1.04502300 | 0.37604300  | 0.74448500  |
| H | -0.24659700 | 0.01653200  | 1.39159700  |
| C | -0.90671200 | 1.72579100  | 0.26434900  |
| C | -2.03027700 | 2.56350100  | 0.03208300  |

|   |             |             |             |
|---|-------------|-------------|-------------|
| C | 0.38426200  | 2.28010800  | -0.04693500 |
| C | -1.89710500 | 3.85700500  | -0.44560600 |
| H | -3.01497500 | 2.17038000  | 0.26256900  |
| C | 0.49043000  | 3.60152900  | -0.52444800 |
| C | -0.63024400 | 4.39712700  | -0.72656700 |
| H | -2.78945000 | 4.46311500  | -0.59748900 |
| H | 1.48407100  | 3.98616000  | -0.74301200 |
| H | -0.52715000 | 5.41257600  | -1.10139100 |
| C | 1.55832800  | 1.49617500  | 0.09556300  |
| C | 2.56112700  | 0.81140800  | 0.21175700  |
| C | 3.59286200  | -0.16849600 | 0.17463400  |
| C | 4.91722500  | 0.11390600  | 0.56606200  |
| C | 3.27771300  | -1.47076500 | -0.27894900 |
| C | 5.89801000  | -0.87466000 | 0.51203500  |
| H | 5.16251800  | 1.11434500  | 0.91265600  |
| C | 4.26750700  | -2.44839000 | -0.32658800 |
| H | 2.25792000  | -1.66936900 | -0.60676300 |
| C | 5.57880800  | -2.16102000 | 0.06959900  |
| H | 6.91557500  | -0.64057900 | 0.81910300  |
| H | 4.01438500  | -3.44503500 | -0.68206900 |
| H | 6.34526900  | -2.93221600 | 0.03157600  |

**TS\_exd3**

E(B3lyp/6-31g(d) = -1210.410014 Hartree

Imaginary Freq= -739.04

-1 1

|   |             |             |             |
|---|-------------|-------------|-------------|
| C | 6.27710400  | 0.99189200  | -0.23957800 |
| C | 5.76336600  | -0.23983900 | 0.18563200  |
| C | 4.38245000  | -0.35106700 | 0.30813400  |
| C | 3.52137200  | 0.72282700  | 0.01757300  |
| C | 4.04648600  | 1.93810300  | -0.42072000 |
| C | 5.43336900  | 2.06995900  | -0.53871600 |
| H | 7.35383800  | 1.10964000  | -0.33905600 |
| H | 6.40944000  | -1.08278100 | 0.41149100  |
| H | 3.37491700  | 2.75741100  | -0.66084800 |
| H | 5.86153500  | 3.01316800  | -0.86857600 |
| C | 2.16345300  | 0.22234200  | 0.19689400  |
| N | 1.04947000  | 0.73775600  | -0.17407800 |
| O | 3.73194700  | -1.48871500 | 0.69649500  |
| C | 2.31798900  | -1.14750100 | 0.83392300  |
| C | 1.35603600  | -2.10308800 | 0.19224400  |
| C | 1.62909400  | -3.46487500 | 0.04233400  |
| C | 0.11229400  | -1.54866600 | -0.19048700 |
| C | 0.65964000  | -4.31467100 | -0.48396000 |
| H | 2.60322200  | -3.84506000 | 0.33918300  |
| C | -0.85805700 | -2.42983900 | -0.70999500 |

|   |             |             |             |
|---|-------------|-------------|-------------|
| C | -0.58641400 | -3.78866600 | -0.84562700 |
| H | 0.86903400  | -5.37544000 | -0.60576900 |
| H | -1.82936200 | -2.03585100 | -0.99789400 |
| H | -1.35456100 | -4.44493400 | -1.25037900 |
| C | -0.11617900 | -0.07112500 | -0.12125300 |
| C | -1.37217100 | 0.47361000  | -0.13814600 |
| C | -1.57765100 | 1.92063000  | -0.08809400 |
| C | -0.87424200 | 2.81694400  | 0.75077800  |
| C | -2.61659000 | 2.46786000  | -0.88096500 |
| C | -1.17184000 | 4.17869200  | 0.77156300  |
| H | -0.09183100 | 2.42659400  | 1.39285200  |
| C | -2.89062700 | 3.83296200  | -0.88170800 |
| H | -3.20374600 | 1.78292500  | -1.48640500 |
| C | -2.17165400 | 4.70120300  | -0.05343700 |
| H | -0.61265900 | 4.84051800  | 1.43183100  |
| H | -3.68468100 | 4.22192200  | -1.51739300 |
| H | -2.39765400 | 5.76579700  | -0.03989900 |
| H | 2.13499800  | -1.08364500 | 1.92064900  |
| H | -2.65514700 | -0.25594400 | -0.38269500 |
| O | -3.63170700 | -0.75155700 | -0.76988800 |
| C | -4.57269200 | -1.00820000 | 0.23637100  |
| C | -5.63162100 | -1.95595900 | -0.36246300 |
| H | -6.43037900 | -2.19823300 | 0.35372100  |

|   |             |             |             |
|---|-------------|-------------|-------------|
| H | -6.08468500 | -1.49204300 | -1.24686700 |
| H | -5.15528900 | -2.89041000 | -0.68235800 |
| C | -5.26150800 | 0.30320800  | 0.68395800  |
| H | -6.03494200 | 0.13115100  | 1.44730500  |
| H | -4.52182600 | 1.00018500  | 1.09276600  |
| H | -5.73100600 | 0.78728700  | -0.18090300 |
| C | -3.91763300 | -1.68490000 | 1.46413700  |
| H | -3.14942400 | -1.03135600 | 1.89186700  |
| H | -4.65209600 | -1.91550500 | 2.24959200  |
| H | -3.42854900 | -2.61854200 | 1.16312900  |

### TS\_exd2

E(B3lyp/6-31g(d) = -976.669475 Hartree

Imaginary Freq= -139.98

-1 1

|   |            |             |             |
|---|------------|-------------|-------------|
| C | 5.06170600 | -2.38540900 | -0.02543600 |
| C | 4.62691300 | -1.30900700 | 0.75937100  |
| C | 3.32987200 | -0.84727300 | 0.55643300  |
| C | 2.47503600 | -1.42118700 | -0.39026300 |
| C | 2.92223000 | -2.48334000 | -1.16851800 |
| C | 4.22138500 | -2.97097000 | -0.98005700 |
| H | 6.07065000 | -2.76924500 | 0.11283400  |
| H | 5.27133400 | -0.84487800 | 1.50128800  |

|   |             |             |             |
|---|-------------|-------------|-------------|
| H | 2.25119000  | -2.91351600 | -1.90857700 |
| H | 4.58196300  | -3.80660400 | -1.57621100 |
| C | 1.18410600  | -0.67006700 | -0.38987800 |
| N | 0.18612900  | -0.71053500 | -1.13621600 |
| O | 2.77722400  | 0.19776600  | 1.25109600  |
| C | 1.39556600  | 0.33327600  | 0.82819900  |
| C | 1.03099900  | 1.71331500  | 0.41239500  |
| C | 1.92048500  | 2.78995200  | 0.45287300  |
| C | -0.27254400 | 1.88708100  | -0.12208800 |
| C | 1.53839500  | 4.04937400  | -0.00785700 |
| H | 2.91603200  | 2.62466500  | 0.85346700  |
| C | -0.63339300 | 3.16626400  | -0.59236200 |
| C | 0.25420100  | 4.23619200  | -0.53075100 |
| H | 2.23897500  | 4.88074300  | 0.03870100  |
| H | -1.63264100 | 3.29779000  | -0.99793600 |
| H | -0.05457200 | 5.21661700  | -0.88856400 |
| C | -1.22310500 | 0.80532400  | -0.19098800 |
| C | -2.39006300 | 0.41166200  | 0.00220400  |
| C | -3.56726000 | -0.34727500 | 0.07769500  |
| C | -4.60971400 | -0.20496400 | -0.88168100 |
| C | -3.79829300 | -1.26433400 | 1.14215200  |
| C | -5.78940500 | -0.93120100 | -0.77881700 |
| H | -4.46214600 | 0.48458000  | -1.70849100 |



|   |             |             |             |
|---|-------------|-------------|-------------|
| C | -4.98498000 | -1.98089300 | 1.23233700  |
| H | -3.01908400 | -1.39921700 | 1.88719900  |
| C | -5.99837500 | -1.82673300 | 0.27779200  |
| H | -6.56101200 | -0.79871100 | -1.53635100 |
| H | -5.12212900 | -2.67638700 | 2.05946700  |
| H | -6.92515700 | -2.39038500 | 0.35430100  |
| H | 0.76333100  | -0.01256300 | 1.65707500  |

### TS\_end2

E(B3lyp/6-31g(d) = -976.661498 Hartree

Imaginary Freq= -206.09

-1 1

|   |             |             |             |
|---|-------------|-------------|-------------|
| C | -4.61264500 | -2.56047500 | 0.06462000  |
| C | -4.19948900 | -1.48497600 | 0.86384900  |
| C | -2.90413700 | -1.00909200 | 0.68003100  |
| C | -2.02986300 | -1.56725000 | -0.25149100 |
| C | -2.44720600 | -2.63958600 | -1.03011500 |
| C | -3.74913000 | -3.13429100 | -0.87644300 |
| H | -5.62120000 | -2.95302600 | 0.18241300  |
| H | -4.85840200 | -1.03573800 | 1.60295100  |
| H | -1.74330500 | -3.07398700 | -1.73751800 |
| H | -4.09261800 | -3.96859600 | -1.48534800 |
| C | -0.69204900 | -0.88964100 | -0.15329800 |

|   |             |             |             |
|---|-------------|-------------|-------------|
| N | 0.40179200  | -1.23338100 | -0.63746900 |
| O | -2.36266800 | 0.02749100  | 1.39331300  |
| C | -1.03748300 | 0.32551000  | 0.86001800  |
| H | -0.33416900 | 0.28535900  | 1.69753600  |
| C | -1.04010900 | 1.71573500  | 0.26704400  |
| C | -2.22535100 | 2.42258600  | 0.04331100  |
| C | 0.20002400  | 2.33752600  | -0.05372200 |
| C | -2.20994700 | 3.72811300  | -0.46018000 |
| H | -3.16888700 | 1.94248200  | 0.27886400  |
| C | 0.19703200  | 3.66641400  | -0.51326000 |
| C | -0.99629400 | 4.35829900  | -0.72868900 |
| H | -3.14954100 | 4.25065900  | -0.63002300 |
| H | 1.15400100  | 4.13336000  | -0.73190100 |
| H | -0.97457400 | 5.37776000  | -1.10890200 |
| C | 1.42413100  | 1.60185100  | 0.04388000  |
| C | 2.00815500  | 0.50483400  | -0.02675000 |
| C | 3.22472300  | -0.26463900 | 0.00993200  |
| C | 4.42254500  | 0.39142500  | 0.37461900  |
| C | 3.28133700  | -1.63726000 | -0.29747300 |
| C | 5.62876900  | -0.30098700 | 0.43310400  |
| H | 4.37806300  | 1.45084000  | 0.61010600  |
| C | 4.49541700  | -2.31990600 | -0.23966200 |
| H | 2.34900900  | -2.11363500 | -0.58242400 |

|   |            |             |             |
|---|------------|-------------|-------------|
| C | 5.67417200 | -1.66419800 | 0.12615200  |
| H | 6.53774600 | 0.22553900  | 0.71908500  |
| H | 4.52051900 | -3.38055900 | -0.48338900 |
| H | 6.61654700 | -2.20668800 | 0.17146200  |

#### TS\_end4

E(B3lyp/6-31g(d) = -1210.425178 Hartree

Imaginary Freq= -288.29

-1 1

|   |             |             |             |
|---|-------------|-------------|-------------|
| C | -4.16675100 | -3.12336000 | -0.33736500 |
| C | -3.97687000 | -1.92409500 | 0.35205500  |
| C | -2.80471100 | -1.21059500 | 0.09126500  |
| C | -1.84223400 | -1.68604600 | -0.81460200 |
| C | -2.04268200 | -2.88990400 | -1.49059400 |
| C | -3.21553600 | -3.60734100 | -1.25151400 |
| H | -5.07459000 | -3.69629800 | -0.15971200 |
| H | -4.70671500 | -1.54872000 | 1.06283300  |
| H | -1.28540700 | -3.25014000 | -2.18148400 |
| H | -3.39411500 | -4.54799300 | -1.76655000 |
| C | -0.74729700 | -0.72260500 | -0.79563400 |
| N | 0.38303800  | -0.85139600 | -1.40818200 |
| O | -2.46881900 | -0.03628700 | 0.66306200  |
| C | -1.16164400 | 0.38191900  | 0.13088400  |

|   |             |             |             |
|---|-------------|-------------|-------------|
| C | -1.29154500 | 1.68139000  | -0.60813700 |
| C | -2.48358100 | 2.41380900  | -0.65162600 |
| C | -0.13401400 | 2.19805900  | -1.24768500 |
| C | -2.54262100 | 3.65793900  | -1.28311400 |
| H | -3.35892500 | 2.01085500  | -0.15401600 |
| C | -0.21657200 | 3.45635700  | -1.86791400 |
| C | -1.40387900 | 4.18652300  | -1.89232800 |
| H | -3.47487200 | 4.21958000  | -1.28129800 |
| H | 0.67576600  | 3.85764200  | -2.34530000 |
| H | -1.43718500 | 5.15933200  | -2.37839800 |
| C | 1.14404100  | 1.48625000  | -1.23381100 |
| C | 1.35118800  | 0.14153000  | -1.24546300 |
| C | 2.73798000  | -0.38441300 | -1.12692400 |
| C | 3.26072800  | -1.30863100 | -2.04352900 |
| C | 3.52965600  | 0.02732400  | -0.04220400 |
| C | 4.57043100  | -1.76923700 | -1.91340900 |
| H | 2.62934500  | -1.65686600 | -2.85606200 |
| C | 4.83930300  | -0.43989400 | 0.08579500  |
| H | 3.06684500  | 0.65208000  | 0.71821800  |
| C | 5.36792600  | -1.32915500 | -0.85260000 |
| H | 4.97075800  | -2.47488900 | -2.63901600 |
| H | 5.44212100  | -0.12333400 | 0.93449100  |
| H | 6.38856900  | -1.69255100 | -0.74953000 |

|   |             |             |             |
|---|-------------|-------------|-------------|
| H | 2.03136900  | 2.11617100  | -1.25779900 |
| H | -0.34046700 | 0.50154800  | 1.06620700  |
| C | 0.54941800  | 0.30493100  | 3.27566900  |
| C | -0.71741600 | 0.95512000  | 3.89891300  |
| H | -0.62995000 | 2.04724200  | 3.84046000  |
| H | -1.60578300 | 0.66112400  | 3.32649400  |
| H | -0.87812100 | 0.67360300  | 4.95168000  |
| C | 0.40638100  | -1.24085200 | 3.35076700  |
| H | -0.48198900 | -1.56180900 | 2.79214700  |
| H | 1.28057500  | -1.70757300 | 2.88099000  |
| H | 0.31590800  | -1.62233100 | 4.38027300  |
| C | 1.78285300  | 0.72695700  | 4.11595000  |
| H | 1.70246500  | 0.44246900  | 5.17693300  |
| H | 2.68625400  | 0.26271200  | 3.70078100  |
| H | 1.90860600  | 1.81503900  | 4.05463000  |
| O | 0.73544000  | 0.72766200  | 1.97734200  |

**TS\_end3**

E(B3lyp/6-31g(d) = -1210.412158 Hartree

Imaginary Freq= -660.89

-1 1

|   |            |            |             |
|---|------------|------------|-------------|
| C | 6.02406900 | 0.92180700 | 0.73773700  |
| C | 5.49491900 | 0.15302800 | -0.30670200 |

|   |             |             |             |
|---|-------------|-------------|-------------|
| C | 4.11057800  | 0.11595900  | -0.43516200 |
| C | 3.26354300  | 0.81685300  | 0.43675300  |
| C | 3.80351800  | 1.58129900  | 1.46985900  |
| C | 5.19309600  | 1.62864400  | 1.61733800  |
| H | 7.10322200  | 0.96794500  | 0.86582700  |
| H | 6.13147000  | -0.39612300 | -0.99381200 |
| H | 3.14162500  | 2.12458100  | 2.13828900  |
| H | 5.63349200  | 2.21615000  | 2.41900900  |
| C | 1.89874500  | 0.59114000  | -0.03094200 |
| N | 0.82448300  | 1.15174200  | 0.38104300  |
| O | 3.44238900  | -0.57380000 | -1.40415800 |
| C | 2.01240400  | -0.42580900 | -1.15945000 |
| C | 1.37389200  | -1.71523700 | -0.70490400 |
| C | 2.10683400  | -2.90313800 | -0.62187000 |
| C | -0.00742700 | -1.66779400 | -0.36056700 |
| C | 1.49310800  | -4.08663900 | -0.21805700 |
| H | 3.15874100  | -2.89213800 | -0.89009400 |
| C | -0.60570300 | -2.90541800 | -0.00435800 |
| C | 0.12579500  | -4.08203100 | 0.08424100  |
| H | 2.06905100  | -5.00852300 | -0.16605100 |
| H | -1.67593800 | -2.90053000 | 0.17506000  |
| H | -0.37106900 | -5.00598000 | 0.37519300  |
| C | -0.86974000 | -0.48938000 | -0.41150100 |

|   |             |             |             |
|---|-------------|-------------|-------------|
| C | -0.42809700 | 0.79100600  | -0.16362100 |
| C | -1.33755700 | 1.96774700  | -0.29885100 |
| C | -2.55712700 | 1.87023000  | -0.99868100 |
| C | -0.98026200 | 3.23073000  | 0.21256300  |
| C | -3.37825400 | 2.98351500  | -1.16702600 |
| H | -2.86304500 | 0.90437700  | -1.38664600 |
| C | -1.80660400 | 4.34209200  | 0.04515900  |
| H | -0.04050700 | 3.32392900  | 0.74573700  |
| C | -3.01223500 | 4.22968500  | -0.64886100 |
| H | -4.31440700 | 2.87509100  | -1.71171000 |
| H | -1.50260200 | 5.30285900  | 0.45809600  |
| H | -3.65530300 | 5.09685200  | -0.78635000 |
| H | 1.54691600  | -0.05253100 | -2.08284100 |
| C | -4.23738700 | -1.23551600 | 0.59785100  |
| C | -4.81120800 | -2.64043000 | 0.89647000  |
| H | -4.00372700 | -3.32618200 | 1.18081100  |
| H | -5.55441800 | -2.62858600 | 1.70752000  |
| H | -5.28724000 | -3.04148900 | -0.00633900 |
| C | -3.51197600 | -0.70818000 | 1.85590600  |
| H | -2.67913500 | -1.36766300 | 2.12613200  |
| H | -3.10033700 | 0.28990800  | 1.67482500  |
| H | -4.19464800 | -0.64880200 | 2.71553300  |
| C | -5.41071200 | -0.28670500 | 0.25424600  |

|   |             |             |             |
|---|-------------|-------------|-------------|
| H | -5.03426200 | 0.72411500  | 0.06457000  |
| H | -5.91015600 | -0.63886800 | -0.65664800 |
| H | -6.15686000 | -0.23125000 | 1.06083200  |
| O | -3.38676400 | -1.34244100 | -0.51246500 |
| H | -2.33453600 | -0.88415000 | -0.42667400 |

### TS\_5

E(B3lyp/6-31g(d) = -976.687692 Hartree

Imaginary Freq= -319.65

-1 1

|   |             |            |             |
|---|-------------|------------|-------------|
| C | -3.21589400 | 3.82726600 | -0.46309400 |
| C | -3.50079200 | 2.49121200 | -0.76212900 |
| C | -2.58831500 | 1.53342900 | -0.33252000 |
| C | -1.41655100 | 1.85674300 | 0.37726800  |
| C | -1.15526000 | 3.19930000 | 0.67453300  |
| C | -2.05455600 | 4.17796300 | 0.24679700  |
| H | -3.90565000 | 4.60488500 | -0.78410700 |
| H | -4.39331700 | 2.20322300 | -1.31075200 |
| H | -0.26281700 | 3.47635800 | 1.23316300  |
| H | -1.85789700 | 5.22497100 | 0.46768700  |
| C | -0.73888700 | 0.59582000 | 0.67860400  |
| N | 0.36340700  | 0.40631500 | 1.44119000  |
| O | -2.68358100 | 0.20161700 | -0.53198900 |



|   |             |             |             |
|---|-------------|-------------|-------------|
| C | -1.53253700 | -0.39316200 | 0.06091300  |
| C | -1.46203000 | -1.81915600 | -0.03656400 |
| C | -2.63995700 | -2.57523900 | -0.28824600 |
| C | -0.21831300 | -2.53674400 | 0.11484200  |
| C | -2.64140600 | -3.95776500 | -0.23143100 |
| H | -3.56443900 | -2.03997400 | -0.48291800 |
| C | -0.27040600 | -3.95069900 | 0.20256100  |
| C | -1.45179600 | -4.65732100 | 0.05551000  |
| H | -3.56925100 | -4.50348600 | -0.39616300 |
| H | 0.67208500  | -4.47627500 | 0.34260600  |
| H | -1.45429400 | -5.74397500 | 0.11866000  |
| C | 1.02805900  | -1.86966900 | 0.04027200  |
| C | 1.62057500  | -0.78226500 | 0.29693400  |
| C | 2.84904000  | -0.07170700 | 0.03609700  |
| C | 4.03189600  | -0.81387400 | -0.19646800 |
| C | 2.94938100  | 1.33395700  | -0.02005700 |
| C | 5.24179000  | -0.18300700 | -0.46681300 |
| H | 3.96405700  | -1.89683200 | -0.16151100 |
| C | 4.16207900  | 1.96122700  | -0.29891800 |
| H | 2.05568200  | 1.92598000  | 0.14171100  |
| C | 5.32069700  | 1.21276000  | -0.51998800 |
| H | 6.13253300  | -0.78535600 | -0.63796400 |
| H | 4.20054500  | 3.04821900  | -0.34423600 |

H 6.26748400 1.70637700 -0.72807700

H 0.73916600 1.32432400 1.70087700

#### TS\_4

E(B3lyp/6-31g(d) = -1210.368223 Hartree

Imaginary Freq= -410.95

-1 1

C -4.73916600 -2.41070000 -0.89171100

C -4.24541800 -1.52788800 0.06987200

C -3.09152100 -0.80752200 -0.24881400

C -2.43941600 -0.96754000 -1.47897300

C -2.95004800 -1.84810300 -2.43101100

C -4.10401100 -2.57603300 -2.13326500

H -5.63613100 -2.98574000 -0.67088900

H -4.72947900 -1.39905700 1.03308700

H -2.44756600 -1.97190700 -3.38899900

H -4.50967400 -3.27681300 -2.85869700

C -1.30153500 -0.02795900 -1.49081600

N -0.51697000 0.30822700 -2.45326800

O -2.50495500 0.10206400 0.54762500

C -1.22716200 0.50301200 -0.08103500

H -0.39673200 -0.21436600 0.53256900

C -1.02529200 1.97332800 0.08800700

|   |             |             |             |
|---|-------------|-------------|-------------|
| C | -2.08362700 | 2.81394600  | 0.46748300  |
| C | 0.24933700  | 2.56829700  | -0.13399000 |
| C | -1.92031600 | 4.19204000  | 0.59386500  |
| H | -3.05052900 | 2.36314000  | 0.66112200  |
| C | 0.39288900  | 3.96604500  | -0.01928000 |
| C | -0.67770100 | 4.77740900  | 0.33839400  |
| H | -2.76791500 | 4.80993700  | 0.88393200  |
| H | 1.37401000  | 4.39685200  | -0.19971800 |
| H | -0.54163300 | 5.85272800  | 0.42953400  |
| C | 1.39899900  | 1.77882300  | -0.41232000 |
| C | 2.38615900  | 1.09250700  | -0.58935000 |
| C | 3.43465900  | 0.14514400  | -0.75830200 |
| C | 3.21417800  | -1.18530000 | -0.33508400 |
| C | 4.67265800  | 0.49402100  | -1.33196100 |
| C | 4.22470000  | -2.13031700 | -0.49675900 |
| H | 2.25063600  | -1.42454700 | 0.12716300  |
| C | 5.67254100  | -0.46481000 | -1.48481700 |
| H | 4.83676600  | 1.51779600  | -1.65796300 |
| C | 5.45298600  | -1.78044200 | -1.06873600 |
| H | 4.05189100  | -3.15311800 | -0.16840500 |
| H | 6.62490500  | -0.18456000 | -1.93072700 |
| H | 6.23527300  | -2.52749900 | -1.18787000 |
| H | -0.75262600 | -0.23890200 | -3.29016400 |

|   |             |             |            |
|---|-------------|-------------|------------|
| C | 0.36911600  | -1.34545200 | 2.50980600 |
| C | -1.02116900 | -1.83375000 | 3.00037800 |
| H | -1.79271400 | -1.11123200 | 2.71313000 |
| H | -1.26162900 | -2.78809000 | 2.51521900 |
| H | -1.06571100 | -1.97682400 | 4.09148200 |
| C | 1.43093400  | -2.38859500 | 2.94384500 |
| H | 1.22929100  | -3.34337200 | 2.44226500 |
| H | 2.43040400  | -2.05431600 | 2.63985600 |
| H | 1.44062300  | -2.56138200 | 4.03111400 |
| C | 0.69812200  | 0.00691500  | 3.19665400 |
| H | 1.66935000  | 0.37052800  | 2.84126000 |
| H | -0.05468600 | 0.75925500  | 2.93127200 |
| H | 0.73190100  | -0.06671900 | 4.29486300 |
| O | 0.39562800  | -1.23354400 | 1.13061900 |

(1) Gai, R.; Back, D. F.; Zeni, G. Potassium tert-Butoxide-Catalyzed Synthesis of Benzofuroazepines via Cyclization of (2-Alkynylbenzyl) oxy Nitriles. *The Journal of Organic Chemistry* **2015**, *80* (20), 10278-10287.
